# Supplementary material for: CD8+ T-cell responses towards conserved influenza B virus epitopes across anatomical sites and age
Source: Springer Nature journal article supplement (doi:10.1038/s41467-024-47576-y), 2024-04-29
Supplement: MOESM1 [file 41467_2024_47576_MOESM1_ESM.pdf]

## SUPPLEMENTARY FILES

Tejas Menon<sup>1,\*</sup>, Patricia T. Illing<sup>2,\*</sup>, Priyanka Chaurasia<sup>2,\*</sup>, Hayley A. McQuilten<sup>1</sup>, Chloe Shepherd<sup>2</sup>, Louise C. Rowntree<sup>1</sup>, Jan Petersen<sup>2</sup>, Dene R. Littler<sup>2</sup>, Grace Khuu<sup>2</sup>, Ziyi Huang<sup>2</sup>, Lilith F Allen<sup>1</sup>, Steve Rockman<sup>1,3</sup>, Jane Crowe<sup>4</sup>, Katie L. Flanagan<sup>5,6,7</sup>, Linda M. Wakim<sup>1</sup>, Thi H. O. Nguyen<sup>1</sup>, Nicole A. Mifsud<sup>2</sup>, Jamie Rossjohn<sup>2,8,#</sup>, Anthony W. Purcell<sup>2,#</sup>, Carolien E van de Sandt<sup>1,9,#</sup> and Katherine Kedzierska<sup>1,#</sup>

<sup>1</sup>Department of Microbiology and Immunology, University of Melbourne, at the Peter Doherty Institute for Infection and Immunity, Parkville, Australia.

<sup>2</sup>Infection and Immunity Program & Department of Biochemistry and Molecular Biology, Biomedicine Discovery Institute, Monash University, Clayton, Australia.

<sup>3</sup>Seqirus, Parkville, VIC, Australia.

<sup>4</sup>Deepdene Surgery, Deepdene, Victoria, Australia

<sup>5</sup>Tasmanian Vaccine Trial Centre, Launceston General Hospital, Launceston, TAS, Australia.

<sup>6</sup>School of Health Sciences and School of Medicine, University of Tasmania, Launceston, TAS, Australia.

<sup>7</sup>School of Health and Biomedical Science, RMIT University, Melbourne, VIC, Australia.

<sup>8</sup>Institute of Infection and Immunity, Cardiff University School of Medicine, Cardiff, UK.

<sup>9</sup>Department of Hematopoiesis, Sanquin Research, Amsterdam, The Netherlands, and Amsterdam UMC location University of Amsterdam, Landsteiner Laboratory; Amsterdam, The Netherlands.

\*These authors contributed equally

#These authors jointly supervised the work

Correspondence: [kkedz@unimelb.edu.au](mailto:kkedz@unimelb.edu.au)

**Supplementary Fig. 1** Gating strategy for human ICS.

**Supplementary Fig. 2** Frequencies expanded HLA-I-peptide-specific CD8<sup>+</sup> T-cell populations.

**Supplementary Fig. 3** *Ex vivo* characterisation of IBV-specific CD8<sup>+</sup> T-cells across age groups.

**Supplementary Fig. 4** IBV-specific CD8<sup>+</sup> T-cells across human tissues.

**Supplementary Fig. 5** Analysis of TCR repertoire.

**Supplementary Fig. 6** Gibbs cluster analysis of IBV peptides.

**Supplementary Table 1.** Selected HLA-B\*07:02, -B\*08:01 and B\*35:01 restricted IBV peptides.

**Supplementary Table 2.** Study donor demographics.

**Supplementary Table 3.** Immunogenic B7-I, B8-I and B35-I pools.

**Supplementary Table 4.** Data collection and refinement statistics.

**Supplementary Table 5.** Expanded clonotypes.

**Supplementary Table 6.** Clonotype counts of B7/NP<sub>30-38</sub>.

**Supplementary Table 7.** Clonotype counts of B8/NP<sub>30-38</sub>.

**Supplementary Table 8.** Clonotype counts of B7/NS1<sub>196-206</sub>.

**Supplementary Table 9.** Clonotype counts of B8/NP<sub>92-99</sub>.

**Supplementary Table 10.** TCR sequencing primers

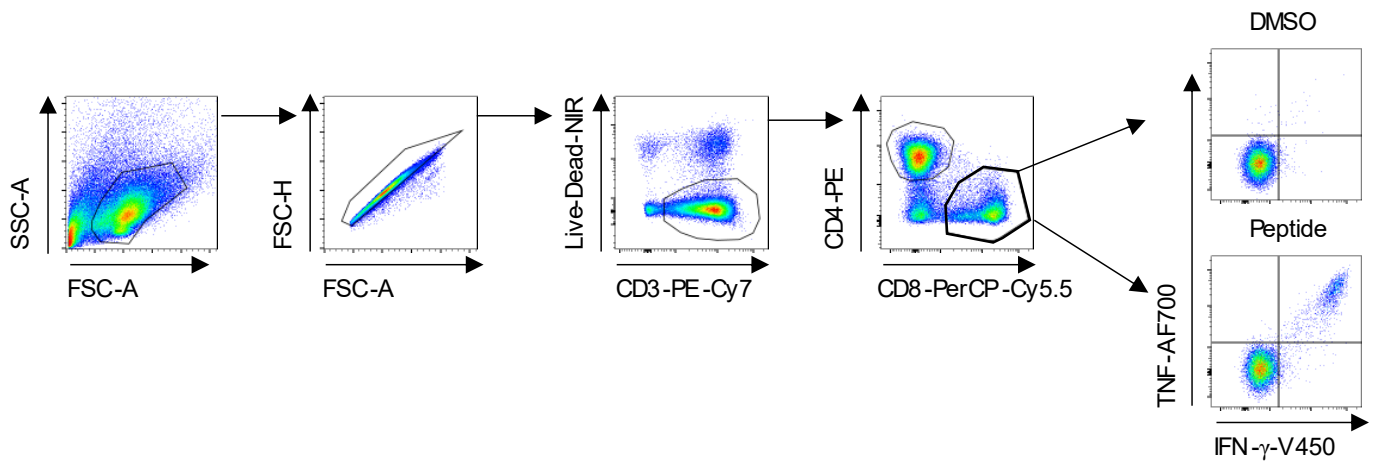

**Supplementary Fig. 1. Gating strategy for human ICS.** IFN- $\gamma$  and TNF producing CD8<sup>+</sup> T-cells were identified by first gating on CD3<sup>+</sup> live lymphocytes.

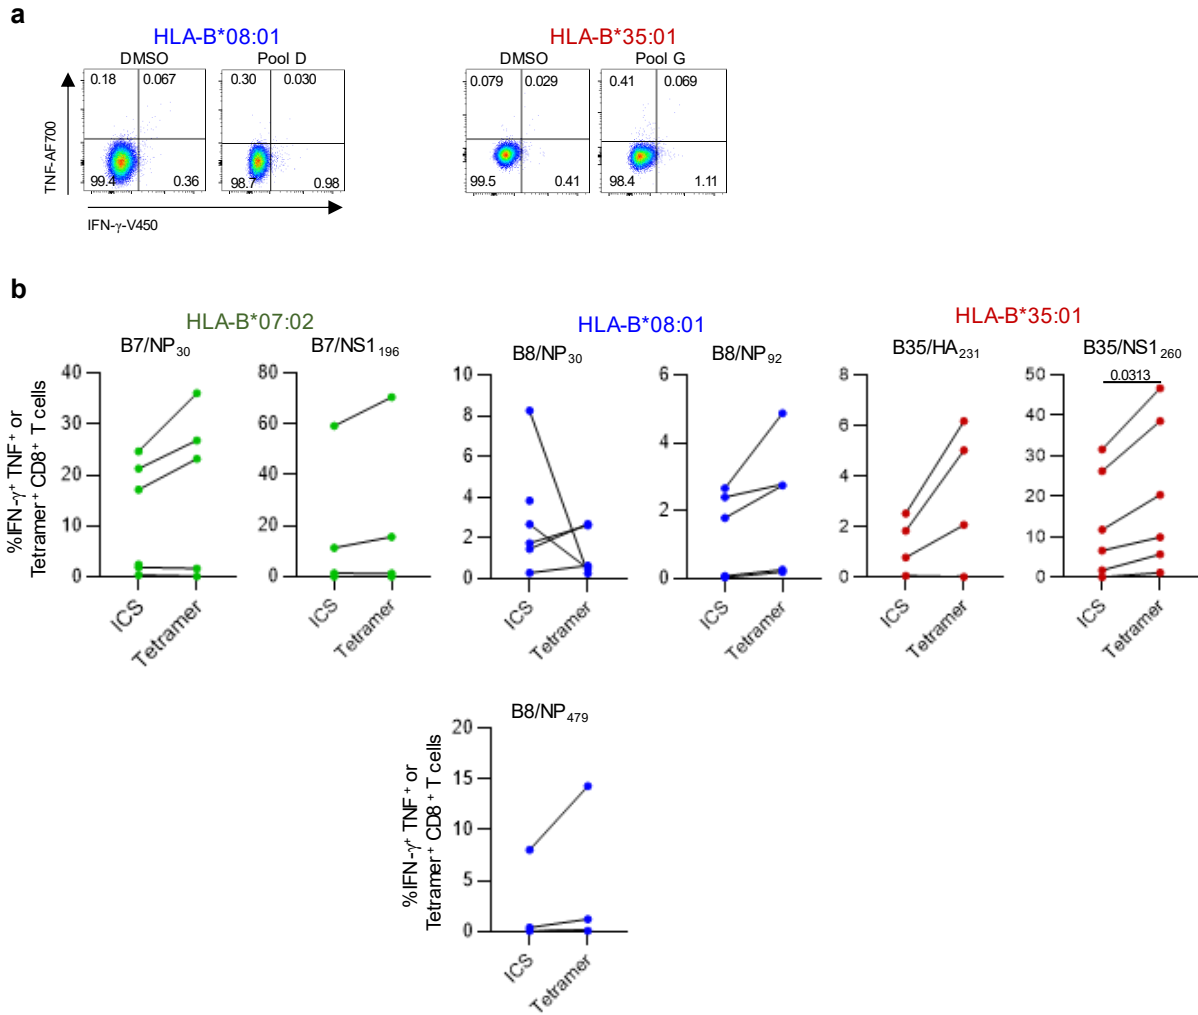

**Supplementary Fig. 2. Frequencies expanded HLA-I-peptide-specific CD8<sup>+</sup> T-cell populations. (a)** Representative FACS plots of IFN- $\gamma$ <sup>+</sup>TNF<sup>+</sup> CD8<sup>+</sup> T-cells restimulated with peptide pools D or G on day 10. **(b)** Comparison of IFN- $\gamma$ <sup>+</sup>TNF<sup>+</sup> and tetramer<sup>+</sup> frequencies in IBV-specific CD8<sup>+</sup> T-cells within day 12 expanded pool-specific CD8<sup>+</sup> T-cells (n=4-6 donors). Statistical significance was determined with the Wilcoxon matched-pairs signed rank test. Source data are provided as a Source Data file.

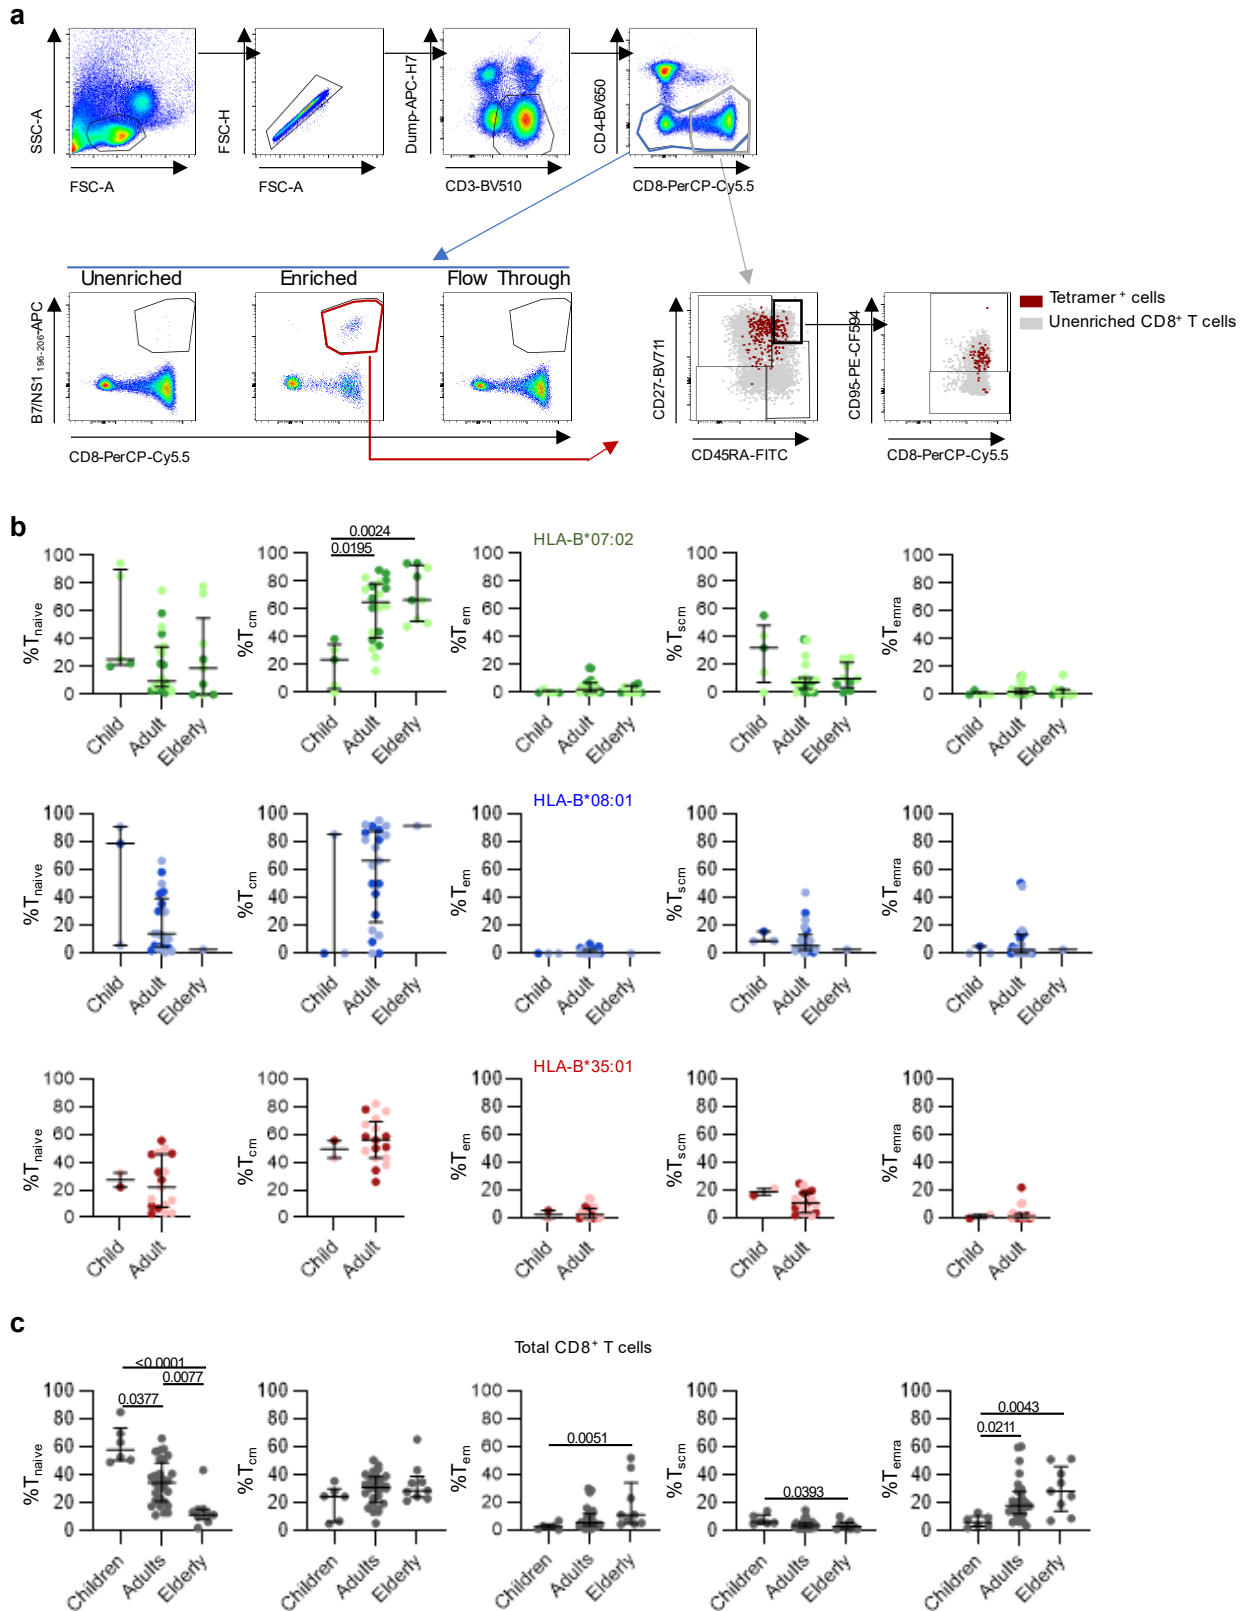

**Supplementary Fig. 3. Ex vivo characterisation of IBV-specific CD8<sup>+</sup> T-cells across age groups.** (a) Representative FACS gating strategy used to characterize the total CD8<sup>+</sup> T-cell population and IBV-specific CD8<sup>+</sup> T-cells. The second line indicates unenriched, enriched and flowthrough fractions of the TAME assay. The unenriched fraction was used to characterize the frequency and phenotype of the total

CD8<sup>+</sup> T-cell population (grey gate and cell populations), whereas the IBV-specific CD8<sup>+</sup> T-cells of the enriched fraction were used to characterize the frequency and phenotype of the IBV-specific CD8<sup>+</sup> T-cells (red gate and cell populations). Naïve/memory T-cell subsets were identified as T<sub>cm</sub> (CD27<sup>+</sup>CD45RA<sup>-</sup>) cells, T<sub>eff</sub> (CD27<sup>-</sup>CD45RA<sup>-</sup>), T<sub>emra</sub> (CD27<sup>-</sup>CD45RA<sup>+</sup>), T<sub>naïve</sub> (CD27<sup>+</sup>CD45RA<sup>+</sup>CD95<sup>-</sup>) and T<sub>scm</sub> (CD27<sup>+</sup>CD45RA<sup>+</sup>CD95<sup>+</sup>) cells. **(b)** IBV/HLA-B\*07:02 tetramers (n=18 donors), IBV/HLA-B\*08:01 tetramers (n=14 donors) and IBV/HLA-B\*35:01 tetramers (n=10 donors). **(c)** Proportions of memory phenotypes of total CD8<sup>+</sup> T-cells in children (n=6), adults (n=28) and elderly donors (n=9). **(b-c)** Statistical significance was determined using a two tailed Kruskal-Wallis with Dunn's test for multiple comparisons (HLA-B\*07:02, HLA-B\*08:01 and Total CD8<sup>+</sup> T cells) or **(b)** Mann-Whitney U test (HLA-B\*35:01). Source data are provided as a Source Data file.

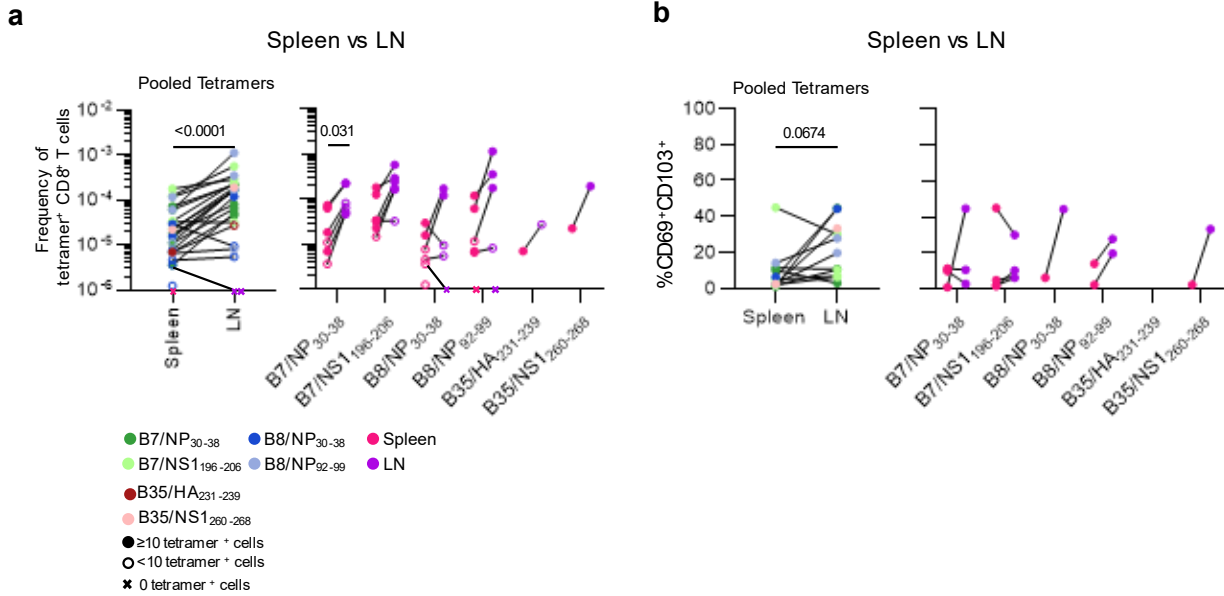

**Supplementary Fig. 4. IBV-specific CD8<sup>+</sup> T-cells across human tissues. (a)** Frequency of IBV-specific CD8<sup>+</sup> T-cells in paired spleen and LN samples with tetramers collated (n=26 donors; spleen and n=24 donors; LN) or separate (n=1-6 donors). Donors which had 0 tetramer<sup>+</sup> cells counted are represented as “x”, and were included in statistics as 0. Open symbols represent <10 tetramer<sup>+</sup> cells counted. **(b)** Proportion of IBV-specific CD8<sup>+</sup> T<sub>m</sub> in paired spleen and LN with tetramers collated (n=11 donors each) or separate (n=1-3 donors). Statistical significance was determined using a two tailed Wilcoxon matched-pairs signed rank test. Source data are provided as a Source Data file.

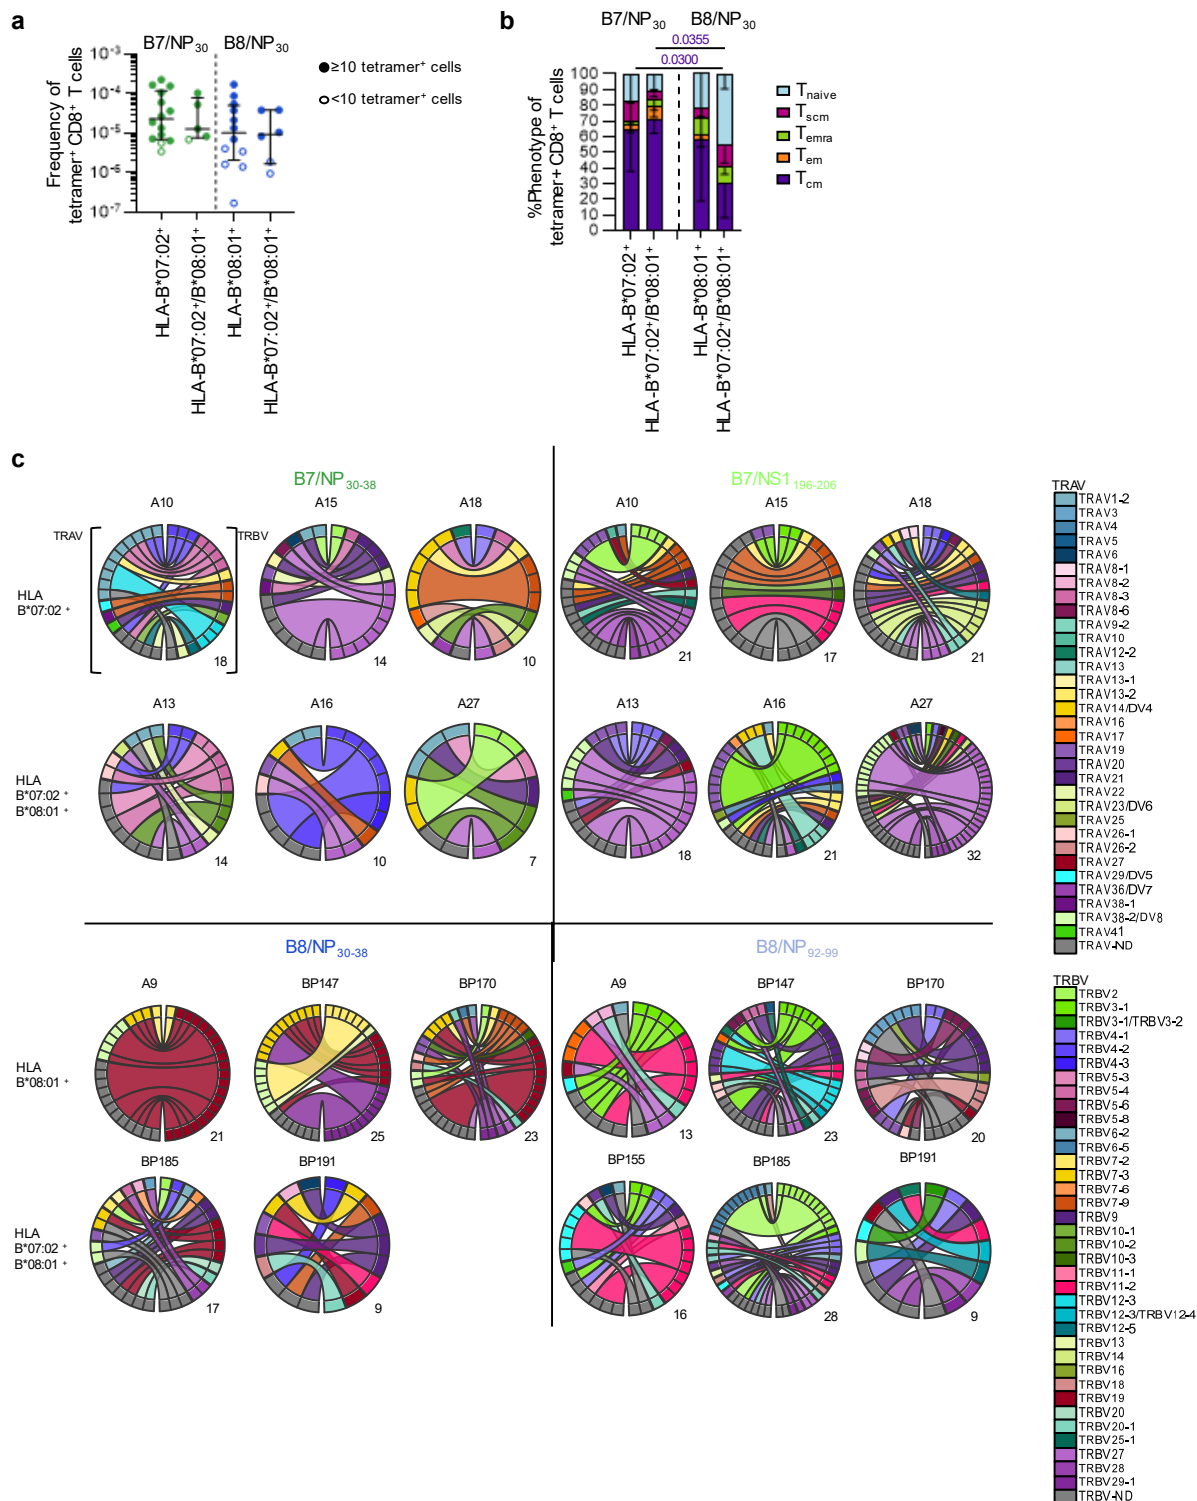

**Supplementary Fig. 5. Analysis of TCR repertoire. (a)** Frequency of B7/NP<sub>30</sub><sup>+</sup>CD8<sup>+</sup> and B8/NP<sub>30</sub><sup>+</sup>CD8<sup>+</sup> T-cells across HLA-B\*07:02<sup>+</sup> (n=14 donors), HLA-B\*08:01<sup>+</sup> (n=12) and HLA-B\*07:02<sup>+</sup>/B\*08:01<sup>+</sup> donors (n=7 donors). Open symbols represent <10 tetramer<sup>+</sup> cells counted, excluded from phenotypic analysis. Statistical significance was determined with Mann-Whitney U test for frequency. Bars represent median and IQR. **(b)** Phenotype of B7/NP<sub>30</sub><sup>+</sup>CD8<sup>+</sup> and B8/NP<sub>30</sub><sup>+</sup>CD8<sup>+</sup> T-cells across HLA-B\*07:02<sup>+</sup> (n=12 donors), HLA-B\*08:01<sup>+</sup> (n=6) and HLA-B\*07:02<sup>+</sup>/B\*08:01<sup>+</sup> donors (n=7 donors). Statistical significance was determined by two-way ANOVA with Sidak's

test for multiple comparisons for phenotype. Bars represent mean and SD **(c)** Circos plots of TRAV and TRBV gene usage per donor. Left arch segment colours indicate TRAV usage, right outer arch colours depict TRBV usage. Connecting lines indicated TRAV-TRBV gene pairing and are coloured based on their TRBV usage and segmented based on their CRD3 $\alpha$  and CDR3 $\beta$  sequence, the thickness is proportional to the number of TCR clones with the respective pair. The number of sequences considered for each circos plot is shown at the right bottom. Source data are provided as a Source Data file.



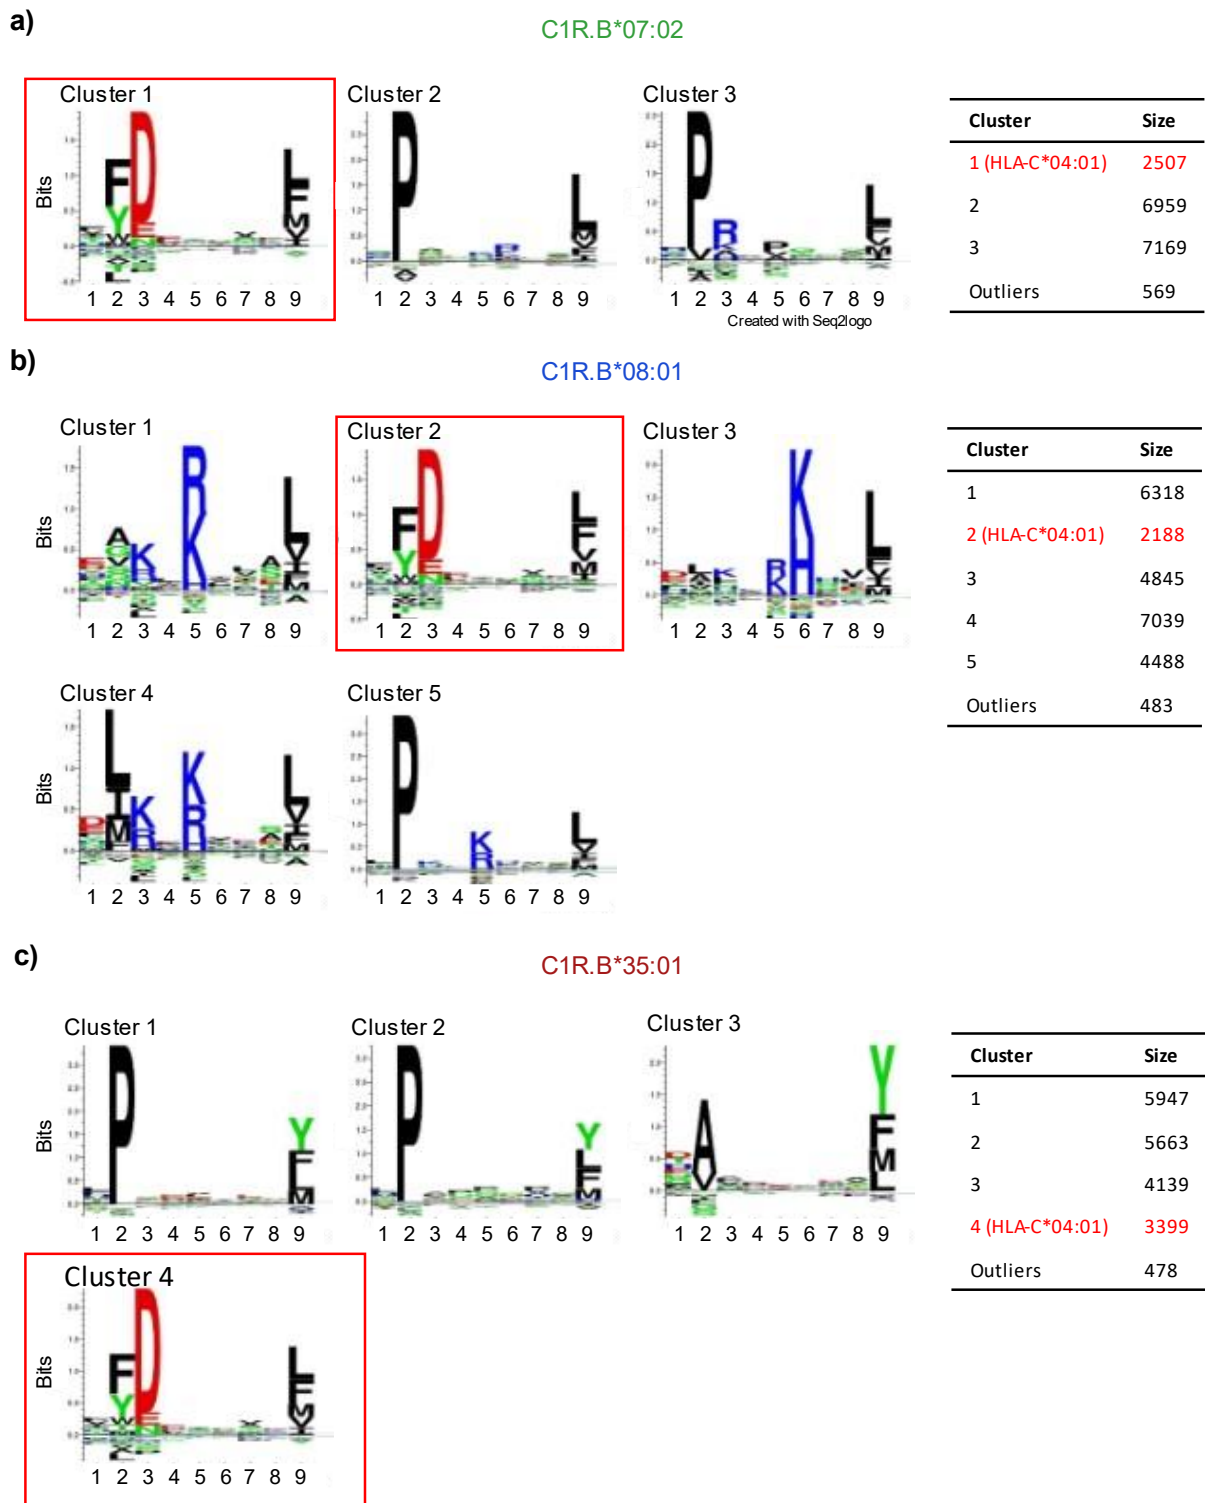

**Supplementary Fig. 6. Gibbs cluster analysis of IBV peptides.** Peptide motifs for peptide sequence clusters generated via Gibbs cluster analysis of unfiltered 8-13 amino acid (a) C1R.B\*07:02, (b) C1R.B\*08:01 and (c) C1R.B\*35:01 human peptide sequences identified at 1% FDR. Peptides from Cluster 1, aligning with the binding motif for HLA-C\*04:01, were filtered from motif analyses for C1R-B\*07:02, while Cluster 2 peptides were filtered from motif analyses for C1R.B\*08:01 and Cluster 4 peptides were filtered from motif analyses for C1R.B\*35:01.

**Supplementary Table 1.** Selected HLA-B\*07:02, -B\*08:01 and B\*35:01 restricted IBV peptides.

| HLA         | Pool        | Peptide Name     | Sequence            | Length |
|-------------|-------------|------------------|---------------------|--------|
| HLA-B*07:02 | A           | PB1+280-89       | YPKIMSRVPM          | 10     |
|             |             | HA+3211-220      | RPNYRLGVPL          | 10     |
|             |             | PB1706-714       | KPVGQHSML           | 9      |
|             |             | HA224-232        | KPQKFTSSA           | 9      |
|             |             | NS1121-129       | YPSTPGRCL           | 9      |
|             |             | HA255-263        | <u>LPQSGRIVV</u>    | 9      |
|             |             | NP472-481        | RPIALSKQAV          | 10     |
|             |             | HA91-99          | IPSARVSIL           | 9      |
|             |             | NP233-244        | <u>LPRRSGATGVAI</u> | 12     |
|             |             | HA27-35          | SPHVVKAT            | 9      |
|             | NP+2180-188 | MIKPSTSAL        | 9                   |        |
|             | NP30-38     | <u>RPIIRPATL</u> | 9                   |        |
|             | NS166-74    | EPESKRMSL        | 9                   |        |
|             | B           | HA+382-92        | MPQLHRSGRGL         | 11     |
|             |             | PB1393-404       | KPFFNEEGTASL        | 12     |
|             |             | NS1253-265       | KPIRAAETAVGVL       | 13     |
|             |             | NS1196-206       | <u>HPNGYKSLSTL</u>  | 11     |
|             |             | NA458-466        | TVTGVNMAL           | 9      |
|             |             | NP536-546        | IPIKQTIPNFF         | 11     |
|             |             | NS262-70         | <u>TIRLVTEEL</u>    | 9      |
| HA110-119   |             | FPIIMHDRTKI      | 10                  |        |
| HLA-B*08:01 | C           | PA453-460        | TVMMKYVL            | 8      |
|             |             | NS166-74         | EPESKRMSL           | 9      |
|             |             | NS211-19         | EWRMKKMAI           | 9      |
|             |             | NA201-209        | LLKIKYGEA           | 9      |
|             |             | NP30-38          | <u>RPIIRPATL</u>    | 9      |
|             |             | PB1186-193       | NIKKKLP             | 8      |
|             |             | NP407-414        | EFKPRSA             | 8      |
|             |             | NP500-508        | LLKMMNDSM           | 9      |
|             |             | NP468-476        | <u>FAVERPIAL</u>    | 9      |
|             |             | NP173-181        | FLKEEVKTM           | 9      |
|             |             | PB2560-567       | TLKAQFL             | 8      |
|             |             | PB2207-215       | YMLERELVA           | 9      |
|             |             | NA150-159        | RNKLRHLISV          | 10     |
|             |             | NA130-137        | FALTHYAA            | 8      |
|             |             | NP479-487        | <u>QAVRRMLSM</u>    | 9      |
|             |             | NP92-99          | <u>QMMVKAGL</u>     | 8      |
|             |             | PA458-465        | YVLFHTSL            | 8      |
|             |             | PB2187-195       | LIKEKREKL           | 9      |
|             | NP517-525   | FIGKKMFQI        | 9                   |        |
|             | D           | HA481-488        | ERKLKML             | 8      |
|             |             | NA150-157        | RNKLRHLI            | 8      |
|             |             | PA132-139        | FWKKKEKL            | 8      |
|             |             | HA110-119        | FPIIMHDRTKI         | 10     |
|             |             | PB1216-224       | EYIKRALS            | 9      |
|             |             | NS1168-175       | EGKFRLTI            | 8      |
|             |             | NS2115-122       | EVYSRQCL            | 8      |
|             |             | PB2207-214       | YMLERELV            | 8      |
|             |             | M1170-177        | VPGVRREM            | 8      |
|             |             | NP74-82          | EIKKSVYNM           | 9      |
|             |             | NA414-422        | EIKDKKCDV           | 9      |
|             |             | NP396-403        | DLRVLSAL            | 8      |
|             |             | PB2594-601       | SGFARAVL            | 8      |
| PB2497-505  |             | VSITKNLSL        | 9                   |        |
| PA131-139   | YFWKKKEKL   | 9                |                     |        |
| NP263-271   | ADRGLLRDI   | 9                |                     |        |
| NP377-385   | DAKDKSQLF   | 9                |                     |        |

|                       |                         |                        |                  |    |
|-----------------------|-------------------------|------------------------|------------------|----|
| HLA-B*35:01           | E                       | PB1 <sub>22-30</sub>   | FPYTGVPY         | 9  |
|                       |                         | PB2 <sub>66-74</sub>   | <u>MANRIPLEY</u> | 9  |
|                       |                         | NP <sub>468-476</sub>  | FAVERPIAL        | 9  |
|                       |                         | NA <sub>386-394</sub>  | DPWADSDAL        | 9  |
|                       |                         | NS <sub>247-56</sub>   | YPNLVKSTDY       | 10 |
|                       |                         | PB2 <sub>431-439</sub> | SPMYQLQRY        | 9  |
|                       |                         | M1 <sub>132-140</sub>  | YLNPGNYSM        | 9  |
|                       |                         | NA <sub>375-383</sub>  | MGMGLYVKY        | 9  |
|                       |                         | NP <sub>82-90</sub>    | MVVKLGEFY        | 9  |
|                       |                         | NP <sub>157-165</sub>  | MVRDDKTIY        | 9  |
|                       |                         | NP <sub>536-545</sub>  | IPIKQTIPNF       | 10 |
|                       |                         | PA <sub>399-407</sub>  | VAAWVQTEM        | 9  |
|                       |                         | HA <sub>231-239</sub>  | <u>SANGVTTHY</u> | 9  |
|                       |                         | NA <sub>164-172</sub>  | IPTVENSIF        | 9  |
|                       |                         | HA <sub>336-344</sub>  | CPIWVKTPL        | 9  |
|                       |                         | NP <sub>536-544</sub>  | IPIKQTIPN        | 9  |
|                       |                         | NA <sub>40-50</sub>    | FPSTEITAPTM      | 11 |
| F                     | NS <sub>1260-268</sub>  | <u>TAVGVLSQF</u>       | 9                |    |
|                       | HA <sub>110-118</sub>   | <b>FPIMHDRTK</b>       | 9                |    |
|                       | NA <sub>386-396</sub>   | DPWADSDALAF            | 11               |    |
|                       | NA <sub>111-119</sub>   | APLIIREPF              | 9                |    |
|                       | NP <sub>71-80</sub>     | TPTEIKKSVY             | 10               |    |
|                       | NP <sub>536-546</sub>   | IPIKQTIPNFF            | 11               |    |
|                       | NP <sub>165-173</sub>   | <u>YFSPIRVTF</u>       | 9                |    |
|                       | PB2 <sub>277-285</sub>  | NPLELAVEI              | 9                |    |
|                       | HA <sub>255-265</sub>   | LPQSGRIVVDY            | 11               |    |
|                       | HA <sub>255-263</sub>   | LPQSGRIVV              | 9                |    |
|                       | HA <sub>91-99</sub>     | IPSARVSIL              | 9                |    |
|                       | PB2 <sub>156-166</sub>  | MPPDEASNVIM            | 11               |    |
|                       | HA <sub>307-315</sub>   | EADCLHEKY              | 9                |    |
|                       | PA <sub>216-229</sub>   | VPAGFSNFEGMRSY         | 14               |    |
|                       | HA <sub>163-171</sub>   | NGNGFFATM              | 9                |    |
|                       | PB1 <sub>486-494</sub>  | TGMFEFTSM              | 9                |    |
|                       | NP <sub>157-166</sub>   | MVRDDKTIYF             | 10               |    |
|                       | HA <sub>246-255</sub>   | FPNQTEDGGL             | 10               |    |
|                       | PB1 <sub>604-612</sub>  | HIPEIVLKY              | 9                |    |
| HA <sub>556-564</sub> | AASSLAVTL               | 9                      |                  |    |
| NA <sub>458-466</sub> | TVTGVNMAL               | 9                      |                  |    |
| G                     | HA <sub>110-122</sub>   | <b>FPIMHDRTKIRQL</b>   | 13               |    |
|                       | HA <sub>255-266</sub>   | LPQSGRIVVDYM           | 12               |    |
|                       | PA <sub>450-458</sub>   | KASTVMMKY              | 9                |    |
|                       | NA <sub>440-448</sub>   | SAATAIYCL              | 9                |    |
|                       | PB1 <sub>157-65</sub>   | ISDVTGCTM              | 9                |    |
|                       | HA <sub>110-119</sub>   | FPIMHDRTKI             | 10               |    |
|                       | HA+2 <sub>172-182</sub> | LPMETDFSQQW            | 11               |    |
|                       | NA <sub>2-12</sub>      | LPSTIQTLTLF            | 11               |    |
|                       | NA <sub>386-395</sub>   | DPWADSDALA             | 10               |    |
|                       | NP <sub>253-262</sub>   | EAIRFIGRAM             | 10               |    |
|                       | NP <sub>30-38</sub>     | RPIIRPATL              | 9                |    |
|                       | NA <sub>387-394</sub>   | PWADSDAL               | 8                |    |
|                       | HA <sub>392-400</sub>   | HGVAVAADL              | 9                |    |
|                       | NA <sub>56-64</sub>     | NASNVQAVN              | 9                |    |
|                       | PA <sub>263-270</sub>   | RPIGPHIY               | 8                |    |
|                       | NP <sub>173-181</sub>   | FLKEEVKTM              | 9                |    |
|                       | PB1 <sub>22-38</sub>    | FPYTGVPYSHGTGTGY       | 17               |    |

Bold indicates overlapping between peptides. Underline indicates immunogenic peptides.

**Supplementary Table 2.** Study donor demographics.

| Cohort          | ID  | Age group | Tissue | HLA-A | HLA-A | HLA-B | HLA-B | HLA-C | HLA-C | Peptide screen | HLA confirmation | Tetramer testing | TAME | Ex vivo TCR | Tetramer staining |
|-----------------|-----|-----------|--------|-------|-------|-------|-------|-------|-------|----------------|------------------|------------------|------|-------------|-------------------|
| Adult           | A1  | Adult     | PBMC   | 01:01 | 03:01 | 35:01 | 57:01 |       |       |                |                  |                  | Yes  |             |                   |
| Median 39 yrs   | A2  | Adult     | PBMC   | 02:01 | 03:01 | 35:01 | 57:01 | 04:01 | 06:02 |                |                  |                  | Yes  |             |                   |
| Range 25-59 yrs | A3  | Adult     | PBMC   | 02:01 | 24:02 | 27:05 | 35:01 | 01:02 | 04:01 |                |                  |                  | Yes  |             |                   |
| 42% F           | A4  | Adult     | PBMC   | 24:02 |       | 07:02 |       | 07:02 |       | Yes            | Yes              | Yes              | Yes  |             |                   |
| 2 Unk sex       | A5  | Adult     | PBMC   | 01:01 | 24:02 | 35:01 | 57:01 | 04:01 | 06:02 | Yes            | Yes              | Yes              | Yes  |             |                   |
|                 | A6  | Adult     | PBMC   | 01:01 | 31:01 | 07:02 | 08:01 | 07:01 | 07:02 | Yes            | Yes              | Yes              | Yes  |             |                   |
|                 | A7  | Adult     | PBMC   | 01:01 | 32:01 | 08:01 | 40:01 | 03:04 | 07:01 | Yes            | Yes              | Yes              | Yes  |             |                   |
|                 | A8  | Adult     | PBMC   | 01:01 | 03:01 | 18:01 | 35:01 | 04:01 | 07:01 | Yes            | Yes              | Yes              | Yes  |             |                   |
|                 | A9  | Adult     | PBMC   | 26:01 | 32:01 | 08:01 | 35:03 | 04:01 | 07:02 |                | Yes              |                  | Yes  | Yes         |                   |
|                 | A10 | Adult     | PBMC   | 01:01 | 24:02 | 07:02 | 57:01 | 06:02 | 07:02 |                |                  |                  | Yes  | Yes         |                   |
|                 | A11 | Adult     | PBMC   | 01:01 | 30:02 | 08:01 | 51:01 | 07:18 | 14:02 | Yes            | Yes              | Yes              | Yes  | Yes         |                   |
|                 | A12 | Adult     | PBMC   | 26:01 | 30:01 | 35:01 | 50:01 | 04:01 | 06:02 | Yes            | Yes              | Yes              | Yes  |             |                   |
|                 | A13 | Adult     | PBMC   | 01:01 | 03:01 | 07:02 | 08:01 | 07:01 | 07:02 | Yes            | Yes              | Yes              | Yes  | Yes         |                   |
|                 | A14 | Adult     | PBMC   | 01:01 | 23:01 | 08:01 | 15:01 | 03:03 | 07:01 | Yes            | Yes              | Yes              | Yes  | Yes         |                   |
|                 | A15 | Adult     | PBMC   | 03:01 | 24:02 | 07:02 | 35:08 | 04:01 | 07:02 | Yes            | Yes              | Yes              | Yes  | Yes         |                   |
|                 | A16 | Adult     | PBMC   | 01:01 | 03:01 | 07:02 | 08:01 | 07:01 | 07:02 | Yes            | Yes              | Yes              | Yes  | Yes         |                   |
|                 | A17 | Adult     | PBMC   | 02:01 | 24:02 | 35:01 | 44:02 | 04:01 | 05:01 | Yes            | Yes              | Yes              | Yes  |             |                   |
|                 | A18 | Adult     | PBMC   | 03:01 | 24:02 | 07:02 | 40:02 | 02:02 | 07:02 | Yes            | Yes              | Yes              | Yes  | Yes         |                   |
|                 | A19 | Adult     | PBMC   | 02:01 | 11:01 | 35:01 | 40:01 | 03:04 | 04:01 | Yes            | Yes              | Yes              | Yes  |             |                   |
|                 | A20 | Adult     | PBMC   | 01:01 |       | 07:02 | 08:01 | 07:01 | 07:02 | Yes            | Yes              | Yes              | Yes  | Yes         |                   |
|                 | A21 | Adult     | PBMC   | 02:01 | 11:01 | 18:01 | 35:01 | 04:01 | 07:01 | Yes            | Yes              | Yes              | Yes  |             |                   |
|                 | A22 | Adult     | PBMC   | 01:01 | 29:02 | 08:01 | 44:03 | 07:01 | 16:01 |                | Yes              |                  | Yes  |             |                   |
|                 | A23 | Adult     | PBMC   | 01:01 | 23:01 | 08:01 | 45:01 | 06:02 | 07:01 |                | Yes              |                  | Yes  |             |                   |
|                 | A24 | Adult     | PBMC   | 03:01 | 26:01 | 07:02 | 15:01 |       |       |                | Yes              |                  | Yes  |             |                   |
|                 | A25 | Adult     | PBMC   | 03:01 | 31:01 | 07:02 |       | 03:04 | 07:02 |                | Yes              |                  | Yes  |             |                   |
|                 | A26 | Adult     | PBMC   | 01:01 | 02:01 | 07:02 | 44:03 | 07:02 | 16:01 |                | Yes              |                  | Yes  |             |                   |
|                 | A27 | Adult     | PBMC   | 01:01 | 03:01 | 07:02 | 08:01 | 07:01 | 07:02 |                | Yes              |                  | Yes  | Yes         |                   |
|                 | A28 | Adult     | PBMC   | 01:01 |       | 07:02 | 08:01 | 07:01 | 07:02 |                |                  |                  | Yes  |             |                   |
| Elderly         | E1  | Elderly   | PBMC   | 02:01 | 32:01 | 07:02 | 44:03 |       |       |                |                  |                  | Yes  |             |                   |
| Median 73 yrs   | E2  | Elderly   | PBMC   | 01:01 |       | 07:02 | 08:01 | 07:01 | 07:02 |                |                  |                  | Yes  |             |                   |
| Range 65-87 yrs | E3  | Elderly   | PBMC   | 02:01 | 03:01 | 07:02 | 44:03 | 07:02 | 16:01 |                |                  |                  | Yes  |             |                   |
| 57% F           | E4  | Elderly   | PBMC   | 01:01 | 03:01 | 08:01 | 35:01 |       |       |                |                  |                  | Yes  |             |                   |
| 2 Unk sex       | E5  | Elderly   | PBMC   | 01:01 | 02:01 | 07:02 | 15:01 | 03:04 | 07:02 |                |                  |                  | Yes  |             |                   |
|                 | E6  | Elderly   | PBMC   | 02:01 | 25:01 | 07:02 | 44:02 | 05:01 | 07:02 |                |                  |                  | Yes  |             |                   |
|                 | E7  | Elderly   | PBMC   | 01:01 | 24:02 | 08:01 | 57:01 | 07:01 |       |                |                  |                  | Yes  |             |                   |
|                 | E8  | Elderly   | PBMC   | 01:01 | 29:02 | 08:01 | 44:03 | 07:01 | 16:01 |                |                  |                  | Yes  |             |                   |
|                 | E9  | Elderly   | PBMC   | 01:01 | 03:01 | 08:01 | 40:02 | 02:02 | 07:01 |                |                  |                  | Yes  |             |                   |
| Child           | C1  | Child     | PBMC   | 01:01 | 25:01 | 08:01 | 18:01 | 07:01 | 07:01 |                |                  |                  | Yes  |             |                   |
| Median 9 yrs    | C2  | Child     | PBMC   | 24:02 | 33:01 | 07:02 | 15:01 | 03:03 | 07:02 |                |                  |                  | Yes  |             |                   |
| Range 1-16 yrs  | C3  | Child     | PBMC   | 03:01 |       | 07:02 | 44:03 | 07:02 | 16:01 |                |                  |                  | Yes  |             |                   |
| 50% F           | C4  | Child     | PBMC   | 01:01 | 32:01 | 08:01 | 14:01 | 07:01 | 08:02 |                |                  |                  | Yes  |             |                   |
|                 | C5  | Child     | PBMC   | 03:01 | 30:02 | 07:02 | 18:01 | 05:01 | 07:02 |                |                  |                  | Yes  |             |                   |
|                 | C6  | Child     | PBMC   | 11:01 | 31:01 | 07:02 | 35:01 | 04:01 | 07:02 |                |                  |                  | Yes  |             |                   |
| Spleen          | S1  | Adult     | Spleen | 02:01 | 11:01 | 15:01 | 35:01 | 1     | 4     |                |                  |                  | Yes  |             |                   |
| Median 51 yrs   | S2  | Adult     | Spleen | 03:01 | 11:01 | 08:01 | 38:01 | 7     | 12    |                |                  |                  | Yes  |             |                   |

|                                           |               |         |            |            |       |       |       |       |       |       |     |
|-------------------------------------------|---------------|---------|------------|------------|-------|-------|-------|-------|-------|-------|-----|
| Range 35-64 yrs<br>27% F                  | S3            | Adult   | Spleen     | 02:01      | 24:02 | 27:05 | 35:01 | 2     | 4     | Yes   |     |
|                                           | S4            | Adult   | Spleen     | 02:01      | 24:02 | 27:05 | 35:01 | 2     | 4     | Yes   |     |
|                                           | S5            | Adult   | Spleen     | 01:01      | 31:01 | 08:01 |       | 7     |       | Yes   |     |
|                                           | S6            | Adult   | Spleen     | 1          | 2     | 8     | 13    | 6     | 7     | Yes   |     |
|                                           | S7            | Adult   | Spleen     | 1          | 68    | 7     | 18    | 7     |       | Yes   |     |
|                                           | S8            | Adult   | Spleen     | 2          | 3     | 7     | 57    | 6     | 7     | Yes   |     |
|                                           | S9            | Adult   | Spleen     | 24         | 31    | 7     | 14:02 | 7     | 8     | Yes   |     |
|                                           | S10           | Adult   | Spleen     | 2          | 25    | 7     | 8     | 7     |       | Yes   |     |
|                                           | S11           | Adult   | Spleen     | 01:01      | 24:02 | 08:01 | 13:01 | 03:04 | 07:01 | Yes   |     |
|                                           | S12           | Adult   | Spleen     | 01:01      |       | 08:01 |       | 07:01 |       | Yes   |     |
|                                           | S13           | Adult   | Spleen     | 2          | 11    | 7     | 44    | 05    | 07    | Yes   |     |
|                                           | S14           | Elderly | Spleen     | 3          | 24    | 35    | 39    | 04    | 07    | Yes   |     |
|                                           | S15           | Adult   | Spleen     | 03         | 25    | 07    |       | 07    |       | Yes   |     |
|                                           | Lymph nodes   | N1      | Adult      | Lymph node | 03:01 | 11:01 | 08:01 | 38:01 | 7     | 12    | Yes |
|                                           | Median 49 yrs | N2      | Adult      | Lymph node | 01:01 | 31:01 | 08:01 |       | 7     |       | Yes |
| Range 35-64 yrs<br>27% F                  | N3            | Adult   | Lymph node | 1          | 2     | 8     | 13    | 6     | 7     | Yes   |     |
|                                           | N4            | Adult   | Lymph node | 1          | 68    | 7     | 18    | 7     |       | Yes   |     |
|                                           | N5            | Adult   | Lymph node | 2          | 3     | 7     | 57    | 6     | 7     | Yes   |     |
|                                           | N6            | Adult   | Lymph node | 24         | 31    | 7     | 14:02 | 7     | 8     | Yes   |     |
|                                           | N7            | Adult   | Lymph node | 2          | 25    | 7     | 8     | 7     |       | Yes   |     |
|                                           | N8            | Adult   | Lymph node | 01:01      |       | 08:01 |       | 07:01 |       | Yes   |     |
|                                           | N9            | Adult   | Lymph node | 2          | 11    | 7     | 44    | 05    | 07    | Yes   |     |
|                                           | N10           | Elderly | Lymph node | 3          | 24    | 35    | 39    | 04    | 07    | Yes   |     |
|                                           | N11           | Adult   | Lymph node | 03         | 25    | 07    |       | 07    |       | Yes   |     |
|                                           | Tonsil        | T1      | Child      | Tonsil     | 01:01 | 25:01 | 08:01 | 18:01 | 07:01 | 07:01 | Yes |
| Median 10 yrs                             | T2            | Child   | Tonsil     | 01:01      | 25:01 | 07:02 | 08:01 | 07:01 | 07:02 | Yes   |     |
| Range 6-34 yrs<br>53% F                   | T3            | Child   | Tonsil     | 03:01      | 32:01 | 07:02 | 08:01 | 07:01 | 07:02 | Yes   |     |
|                                           | T4            | Child   | Tonsil     | 24:02      | 33:01 | 07:02 | 15:01 | 03:03 | 07:02 | Yes   |     |
|                                           | T5            | Child   | Tonsil     | 02:01      |       | 08:01 | 44:02 | 05:01 | 07:01 | Yes   |     |
|                                           | T6            | Child   | Tonsil     | 03:01      |       | 07:02 | 44:03 | 07:02 | 16:01 | Yes   |     |
|                                           | T7            | Child   | Tonsil     | 01:01      | 32:01 | 08:01 | 14:01 | 07:01 | 08:02 | Yes   |     |
|                                           | T7            | Child   | Tonsil     | 02:01      | 23:01 | 35:01 | 49:01 | 04:01 | 07:01 | Yes   |     |
|                                           | T8            | Adult   | Tonsil     | 01:01      | 24:02 | 07:02 | 40:01 | 03:04 | 07:02 | Yes   |     |
|                                           | T9            | Child   | Tonsil     | 03:01      | 30:02 | 07:02 | 18:01 | 05:01 | 07:02 | Yes   |     |
|                                           | T10           | Child   | Tonsil     | 11:01      | 31:01 | 07:02 | 35:01 | 04:01 | 07:02 | Yes   |     |
|                                           | T11           | Adult   | Tonsil     | 01:01      | 02:01 | 08:01 | 51:01 | 07:01 | 14:02 | Yes   |     |
|                                           | T12           | Adult   | Tonsil     | 01:01      | 25:01 | 07:02 | 18:01 | 07:02 | 12:03 | Yes   |     |
|                                           | T13           | Child   | Tonsil     | 01:01      | 03:01 | 07:02 | 08:01 | 07:01 | 07:02 | Yes   |     |
| T14                                       | Adult         | Tonsil  | 02:01      | 03:01      | 07:02 | 40:01 | 03:04 | 07:02 | Yes   |       |     |
| Lung                                      | L1            | Adult   | Lung       | 2          | 32    | 7     | 8     | 7     | 7     | Yes   |     |
| Median 26 yrs                             | L2            | Adult   | Lung       | 1          | 3     | 8     | 35    | 4     | 7     | Yes   |     |
| Range 22-41 yrs<br>33% F<br>3 Unk age/sex | L3            | Adult   | Lung       | 7          | 8     | 7     | 8     | 7     |       | Yes   |     |
|                                           | L4            | Unknown | Lung       | 2          | 31    | 7     | 44    | 5     | 7     | Yes   |     |
|                                           | L5            | Unknown | Lung       | 1          | 25    | 8     | 58    | 7     | 7     | Yes   |     |
|                                           | L6            | Unknown | Lung       | 1          | 3     | 35    | 55    | 3     | 4     | Yes   |     |

F, female; Unk, unknown.

**Supplementary Table 3.** Immunogenic B7-I, B8-I and B35-I pools.

| Pool H                 | Pool I                | Pool J                 |
|------------------------|-----------------------|------------------------|
| HA <sub>255-263</sub>  | NP <sub>30-38</sub>   | HA <sub>231-239</sub>  |
| NP <sub>30-38</sub>    | NP <sub>92-99</sub>   | NP <sub>165-173</sub>  |
| NP <sub>233-244</sub>  | NP <sub>468-477</sub> | NP <sub>468-476</sub>  |
| NS1 <sub>196-206</sub> | NP <sub>479-487</sub> | NS1 <sub>260-268</sub> |
| NS2 <sub>62-70</sub>   |                       | PB2 <sub>66-70</sub>   |

**Supplementary Table 4.** Data collection and refinement statistics.

|                                   | <b>B*07:02/NS1<sub>196-206</sub> (8TUB)</b> | <b>B*07:02/NP<sub>30-38</sub> (8TUH)</b> |
|-----------------------------------|---------------------------------------------|------------------------------------------|
| Wavelength                        | 0.95366                                     | 0.95366                                  |
| Resolution range                  | 43.36 - 2.4 (2.486 - 2.4)                   | 48.03 - 2.2 (2.27 - 2.2)                 |
| Space group                       | P 1                                         | P 61 2 2                                 |
| Unit cell (a, b, c)               | 49.2 90.7 104.6                             | 57.2 57.2 396.4                          |
| ( $\alpha$ , $\beta$ , $\gamma$ ) | 97.5 93.8 90.2                              | 90 90 120                                |
| Total reflections                 | 186122 (18249)                              | 442482 (33657)                           |
| Unique reflections                | 66085 (6521)                                | 21009 (1718)                             |
| Multiplicity                      | 2.8 (2.8)                                   | 21.1 (19.6)                              |
| Completeness (%)                  | 94.46 (93.12)                               | 100 (100)                                |
| Mean I/sigma(I)                   | 6.49 (1.10)                                 | 7.9 (2.4)                                |
| R-pim                             | 0.13 (0.34)                                 | 0.064 (0.30)                             |
| CC1/2                             | 0.953 (0.706)                               | 0.993 (0.885)                            |
| R-work                            | 0.197                                       | 0.178                                    |
| R-free                            | 0.237                                       | 0.241                                    |
| Number of non-hydrogen atoms      | 13217                                       | 3320                                     |
| macromolecules                    | 12627                                       | 3203                                     |
| ligands                           | 77                                          | 28                                       |
| solvent                           | 559                                         | 89                                       |
| RMS(bonds)                        | 0.021                                       | 0.007                                    |
| RMS(angles)                       | 1.35                                        | 0.88                                     |
| Ramachandran favoured (%)         | 97.36                                       | 97.7                                     |
| Ramachandran allowed (%)          | 2.64                                        | 2.3                                      |
| Ramachandran outliers (%)         | 0                                           | 0                                        |
| Rotamer outliers (%)              | 0.45                                        | 2.6                                      |
| B factor                          | 37.77                                       | 43.3                                     |

## Supplementary Table 5. Expanded clonotypes

B7/NP<sub>30</sub>

| Clone ID | TRAV       | TRAJ   | CDR3 $\alpha$      | CDR3 $\alpha$ length | TRBV     | TRBJ    | CDR3 $\beta$      | CDR3 $\beta$ length | BP146     | BP155     | BP184     | BP185     | BP189     | KK102    |
|----------|------------|--------|--------------------|----------------------|----------|---------|-------------------|---------------------|-----------|-----------|-----------|-----------|-----------|----------|
| A        | TRAV1-2    | TRAJ33 | CAVNDGSNYQLIW      | 8                    | TRBV12-3 | TRBJ2-1 | CASSPPSGGGYEQFF   | 11                  | 3 (17%)   |           |           |           |           |          |
| Q        |            |        |                    |                      | TRBV10-2 | TRBJ1-5 | CASSEETGNQPQHF    | 9                   | 2 (14%)   |           |           |           |           |          |
| R        | TRAV26-1   | TRAJ42 | CIVRLRTNYGGSQGNLIF | 13                   | TRBV5-4  | TRBJ1-3 | CASSFDRGTGNTIYF   | 10                  | 2 (14%)   |           |           |           |           |          |
| S        |            |        |                    |                      | TRBV5-3  | TRBJ1-3 | CASSFDRGTGNTIYF   | 10                  | 2 (14%)   |           |           |           |           |          |
| T        |            |        |                    |                      | TRBV5-4  | TRBJ1-3 | CASSFDRGTGNTIYF   | 10                  | 2 (14%)   |           |           |           |           |          |
| AA       |            |        |                    |                      | TRBV27   | TRBJ1-3 | CASSPYGGPGNTIYF   | 10                  | 5 (36%)   |           |           |           |           |          |
| AK       |            |        |                    |                      | TRBV4-2  | TRBJ1-1 | CASSQSSGGGRSEAFF  | 11                  | 3 (30%)   |           |           |           |           |          |
| AL       | TRAV1-2    | TRAJ28 | CAVRDSGAGSYQLTF    | 10                   | TRBV4-2  | TRBJ1-1 | CASSQSSGGGRSEAFF  | 11                  | 2 (20%)   |           |           |           |           |          |
| AM       |            |        |                    |                      | TRBV4-3  | TRBJ2-3 | CASSQPSQGRLEQYF   | 11                  | 2 (20%)   |           |           |           |           |          |
| AQ       | TRAV14/DV4 | TRAJ44 | CAMREVGGTASKLTF    | 10                   | TRBV7-9  | TRBJ1-6 | CASSIYPGQLYNSPLHF | 12                  | 3 (30%)   |           |           |           |           |          |
| AY       | TRAV14/DV4 | TRAJ18 | CAITIEGSTLGRLYF    | 10                   | TRBV2    | TRBJ1-4 | CAGRGRPNEKLEFF    | 8                   | 2 (29%)   |           |           |           |           |          |
|          |            |        |                    |                      |          |         |                   | Other singletons    | 15 (83%)  | 6 (43%)   | 9 (64%)   | 3 (30%)   | 7 (70%)   | 5 (71%)  |
|          |            |        |                    |                      |          |         |                   | <b>Total</b>        | <b>18</b> | <b>14</b> | <b>14</b> | <b>10</b> | <b>10</b> | <b>7</b> |

B8/NP<sub>30</sub>

| Clone ID | TRAV         | TRAJ   | CDR3 $\alpha$  | CDR3 $\alpha$ length | TRBV   | TRBJ    | CDR3 $\beta$    | CDR3 $\beta$ length | BP140   | BP147   | BP170 | BP185 | BP191 |
|----------|--------------|--------|----------------|----------------------|--------|---------|-----------------|---------------------|---------|---------|-------|-------|-------|
| A        |              |        |                |                      | TRBV19 | TRBJ1-1 | CASSMIPDMNTEAFF | 10                  | 5 (24%) | 7 (30%) |       |       |       |
| B        | TRAV38-2/DV8 | TRAJ42 | CAPNYGGSQGNLIF | 9                    | TRBV19 | TRBJ2-2 | CASGRIAGELFF    | 7                   | 4 (19%) |         |       |       |       |
| C        |              |        |                |                      | TRBV19 | TRBJ1-1 | CASSMVPDMNTEAFF | 10                  | 3 (14%) |         |       |       |       |
| D        |              |        |                |                      | TRBV19 | TRBJ2-7 | CASSLVGGEQYF    | 7                   | 2 (10%) |         |       |       |       |

|   |              |        |                  |    |          |         |                |    |                  |           |           |           |           |          |
|---|--------------|--------|------------------|----|----------|---------|----------------|----|------------------|-----------|-----------|-----------|-----------|----------|
| L |              |        |                  |    | TRBV29-1 | TRBJ1-2 | CSVVQGAECTF    | 6  |                  | 6 (24%)   |           |           |           |          |
| M | TRAV38-2/DV8 | TRAJ40 | CAPSGTYKYIF      | 6  | TRBV7-2  | TRBJ2-7 | CASSLVGGEQYF   | 7  |                  | 6 (24%)   |           |           |           |          |
| N | TRAV14/DV4   | TRAJ12 | CAMSRQGMDSYKLIIF | 11 | TRBV29-1 | TRBJ1-2 | CSVVQGAECTF    | 6  |                  | 5 (20%)   |           |           |           |          |
| O | TRAV14/DV4   | TRAJ53 | CAMRGGGSNYKLF    | 9  | TRBV19   | TRBJ1-1 | CASSIPDFNTEAFF | 10 |                  | 2 (8%)    |           |           |           |          |
| V | TRAV14/DV4   | TRAJ33 | CAMREGGSNYQLIW   | 9  | TRBV19   | TRBJ1-1 | CASSMPDMNTEAFF | 10 |                  |           | 2 (9%)    |           |           |          |
|   |              |        |                  |    |          |         |                |    | Other singletons | 7 (33%)   | 6 (24%)   | 14 (61%)  | 17 (100%) | 9 (100%) |
|   |              |        |                  |    |          |         |                |    | <b>Total</b>     | <b>21</b> | <b>25</b> | <b>23</b> | <b>17</b> | <b>9</b> |

B7/NS1<sub>196</sub>

| Clone ID | TRAV         | TRAJ   | CDR3 $\alpha$    | CDR3 $\alpha$ length | TRBV   | TRBJ    | CDR3 $\beta$         | CDR3 $\beta$ length | KK102   | BP146   | BP155   | BP184 | BP185 | BP189 |
|----------|--------------|--------|------------------|----------------------|--------|---------|----------------------|---------------------|---------|---------|---------|-------|-------|-------|
| A        | TRAV38-2/DV8 | TRAJ33 | CAYRSAVGYQLIW    | 8                    | TRBV27 | TRBJ1-5 | CASSQYSNQPQHF        | 8                   | 8 (25%) |         |         |       |       |       |
| B        |              |        |                  |                      | TRBV27 | TRBJ1-5 | CASSQYSNQPQHF        | 8                   | 5 (16%) |         |         |       |       |       |
| C        |              |        |                  |                      | TRBV27 | TRBJ1-1 | CASSLMGNTEAFF        | 8                   | 2 (6%)  | 1 (5%)  |         |       |       |       |
| D        | TRAV38-2/DV8 | TRAJ43 | CAYRSAVTYDMRF    | 8                    | TRBV27 | TRBJ1-5 | CASSLYGNQPQHF        | 8                   | 2 (6%)  |         |         |       |       |       |
| E        |              |        |                  |                      | TRBV28 | TRBJ1-1 | CASSLSRGWTEAFF       | 9                   | 2 (6%)  |         |         |       |       |       |
| S        | TRAV19       | TRAJ4  | CALTRPGGGYNKLIIF | 10                   | TRBV2  | TRBJ2-1 | CASRGLQGRIDYNEQFF    | 12                  |         | 4 (19%) |         |       |       |       |
| T        |              |        |                  |                      | TRBV27 | TRBJ2-7 | CASRIYAGSPYEYF       | 10                  |         | 2 (10%) |         |       |       |       |
| AI       |              |        |                  |                      | TRBV27 | TRBJ2-1 | CASSPHPGTSGGASYNEQFF | 15                  |         |         | 3 (17%) |       |       |       |
| AJ       | TRAV38-2/DV8 | TRAJ30 | CAYRSAIQDKIIF    | 8                    | TRBV27 | TRBJ2-1 | CASSPHPGTSGGASYNEQFF | 15                  |         |         | 2 (11%) |       |       |       |
| AK       | TRAV38-2/DV8 | TRAJ41 | CAYRSATGYALNF    | 8                    | TRBV27 | TRBJ2-1 | CASSLYGVSQNEQFF      | 10                  |         |         | 2 (11%) |       |       |       |
| AL       | TRAV3        | TRAJ27 | CAVRDIGTNAGKSTF  | 10                   | TRBV27 | TRBJ2-2 | CASSYRGLSGELFF       | 9                   |         |         | 2 (11%) |       |       |       |



|                  |            |        |                   |    |          |         |                 |    |           |           |           |           |           |           |
|------------------|------------|--------|-------------------|----|----------|---------|-----------------|----|-----------|-----------|-----------|-----------|-----------|-----------|
| AM               | TRAV19     | TRAJ13 | CALSEYSGGYQKVTF   | 10 | TRBV9    | TRBJ2-1 | CASSVATSGGSQQFF | 10 |           |           |           |           |           | 2 (11%)   |
| AU               |            |        |                   |    | TRBV7-9  | TRBJ1-1 | CASNGQGDTEAFF   | 8  |           |           |           |           |           | 2 (12%)   |
| AV               | TRAV3      | TRAJ28 | CAVRAPGAGSYQLTF   | 10 |          |         |                 |    |           |           |           |           |           | 2 (12%)   |
| AW               | TRAV3      | TRAJ28 | CAVRDPGAGSYQLTF   | 10 |          |         |                 |    |           |           |           |           |           | 2 (12%)   |
| AX               |            |        |                   |    | TRBV11-2 | TRBJ1-1 | CASSPGSTEAFF    | 7  |           |           |           |           |           | 2 (12%)   |
| AY               |            |        |                   |    | TRBV11-2 | TRBJ2-2 | CASSLGV EELFF   | 7  |           |           |           |           |           | 2 (12%)   |
| BG               | TRAV19     | TRAJ4  | CALLLFSGGYNKLIF   | 10 | TRBV3-1  | TRBJ2-5 | CASSPREGGETQYF  | 9  |           |           |           |           |           | 7 (33%)   |
| BH               | TRAV14/DV4 | TRAJ10 | CAMREGPELTGGGNKLT | 13 | TRBV20-1 | TRBJ1-2 | CSAKRNRAYHYGYTF | 10 |           |           |           |           |           | 3 (14%)   |
| BT               |            |        |                   |    | TRBV14   | TRBJ2-7 | CASATSGTYEQYF   | 9  |           |           |           |           |           | 2 (10%)   |
|                  |            |        |                   |    |          |         |                 |    | 13        | 14        | 7         | 7         | 11        | 19        |
| Other singletons |            |        |                   |    |          |         |                 |    | (41%)     | (67%)     | (39%)     | (41%)     | (52%)     | (90%)     |
| <b>Total</b>     |            |        |                   |    |          |         |                 |    | <b>32</b> | <b>21</b> | <b>18</b> | <b>17</b> | <b>21</b> | <b>21</b> |

B8/NP<sub>92</sub>

| Clone ID | TRAV    | TRAJ   | CDR3 $\alpha$    | CDR3 $\alpha$ length | TRBV     | TRBJ    | CDR3 $\beta$      | CDR3 $\beta$ length | BP140   | BP147   | BP155 | BP170 | BP185 | BP191 |
|----------|---------|--------|------------------|----------------------|----------|---------|-------------------|---------------------|---------|---------|-------|-------|-------|-------|
| A        | TRAV17  | TRAJ31 | CATDESARLMF      | 7                    | TRBV11-2 | TRBJ2-7 | CASSLIRTWDEQYF    | 9                   | 3 (23%) |         |       |       |       |       |
| B        |         |        |                  |                      | TRBV11-2 | TRBJ2-7 | CASSLIRTWDEQYF    | 9                   | 2 (15%) |         |       |       |       |       |
| K        |         |        |                  |                      | TRBV3-1  | TRBJ2-5 | CASSQWGRPQETQYF   | 10                  |         | 3 (13%) |       |       |       |       |
| L        | TRAV20  | TRAJ45 | CAVRTYSGGGADGLTF | 11                   | TRBV12-3 | TRBJ2-3 | CASAPRRDRGTDQYF   | 11                  |         | 3 (13%) |       |       |       |       |
| M        |         |        |                  |                      | TRBV9    | TRBJ2-3 | CASSPELAGGRLDTQYF | 13                  |         | 2 (9%)  |       |       |       |       |
| N        | TRAV8-3 | TRAJ20 | CACGDYKLSF       | 5                    | TRBV9    | TRBJ2-3 | CASSPELAGGRLDTQYF | 13                  |         | 2 (9%)  |       |       |       |       |
| O        | TRAV8-6 | TRAJ32 | CAVTNGGATNKLIF   | 9                    | TRBV3-1  | TRBJ2-5 | CASSQWGRPQETQYF   | 10                  |         | 2 (9%)  |       |       |       |       |

|    |            |        |                   |    |          |         |                    |    |         |
|----|------------|--------|-------------------|----|----------|---------|--------------------|----|---------|
| AA | TRAV29/DV5 | TRAJ49 | CAANTGNQFYF       | 6  | TRBV11-2 | TRBJ2-2 | CASSWRTGNSGELFF    | 10 | 4 (25%) |
| AB |            |        |                   |    | TRBV11-2 | TRBJ2-2 | CASSWRTGNSGELFF    | 10 | 3 (19%) |
| AL | TRAV3      | TRAJ5  | CAVAMDTGRRALTF    | 9  |          |         |                    |    | 3 (15%) |
| AM | TRAV3      | TRAJ5  | CAVAMDTGRRALTF    | 9  | TRBV9    | TRBJ2-3 | CASSNYPGGARTDTQYF  | 12 | 3 (15%) |
| AN | TRAV8-6    | TRAJ52 | CAVSLNAGGTSYGKLTf | 12 | TRBV18   | TRBJ2-7 | CASSPPRNMEPSYEQYF  | 12 | 3 (15%) |
| AO | TRAV19     | TRAJ48 | CALSEAPSNFGNEKLTf | 12 | TRBV4-1  | TRBJ2-6 | CASSHRDRGISGANLTf  | 13 | 2 (10%) |
| AP | TRAV8-1    | TRAJ13 | CAVNMLGGGYQKVTF   | 11 | TRBV5-6  | TRBJ2-7 | CASSPPARDRDHEQYF   | 11 | 2 (10%) |
| AQ | TRAV8-3    | TRAJ20 | CAVG DYKLSF       | 5  | TRBV9    | TRBJ2-3 | CASSPSQTSGGRTDTQYF | 13 | 2 (10%) |
| AW | TRAV4      | TRAJ39 | CLVGDSGNAGNMLTF   | 10 | TRBV2    | TRBJ1-4 | CASRMTGGKTNEKLFF   | 11 | 8 (29%) |
| AX |            |        |                   |    | TRBV2    | TRBJ1-4 | CASRMTGGKTNEKLFF   | 11 | 2 (7%)  |
| AY | TRAV4      | TRAJ45 | CLVMDSGGGADGLTF   | 10 |          |         |                    |    | 2 (7%)  |

---

Other singletons

8 (62%)    11 (48%)    9 (56%)    5 (25%)    16 (57%)    9 (100%)

---

**Total**

**13    23    16    20    28    9**

---

**Supplementary Table 6. Clonotype counts of B7/NP<sub>30-38</sub>.**

| Clone ID | TRAV       | TRAJ   | CDR3 $\alpha$      | CDR3 $\alpha$ length | TRBV     | TRBJ    | CDR3 $\beta$         | CDR3 $\beta$ length | BP146     | BP155     | BP184     | BP185     | BP189     | KK102    |
|----------|------------|--------|--------------------|----------------------|----------|---------|----------------------|---------------------|-----------|-----------|-----------|-----------|-----------|----------|
| A        | TRAV1-2    | TRAJ33 | CAVNDGGSNYQLIW     | 8                    | TRBV12-3 | TRBJ2-1 | CASSPPSGGGYEQFF      | 11                  | 3         |           |           |           |           |          |
| B        | TRAV1-2    | TRAJ36 | CAVREGTGANNLFF     | 9                    | TRBV5-4  | TRBJ1-5 | CASSDRDRGGNQPHF      | 11                  | 1         |           |           |           |           |          |
| C        | TRAV1-2    | TRAJ36 | CAVREGTGANNLFF     | 9                    | TRBV4-2  | TRBJ2-7 | CASSDREGGPHQYF       | 10                  | 1         |           |           |           |           |          |
| D        | TRAV1-2    | TRAJ36 | CAVREGTGANNLFF     | 9                    | TRBV5-4  | TRBJ2-7 | CASSDREGGPHQYF       | 10                  | 1         |           |           |           |           |          |
| E        | TRAV1-2    | TRAJ36 | CAVREGTGANNLFF     | 9                    | TRBV4-2  | TRBJ1-2 | CASSPREAGISGYTF      | 11                  | 1         |           |           |           |           |          |
| F        | TRAV1-2    | TRAJ36 | CAVREGTGANNLFF     | 9                    | TRBV5-4  | TRBJ2-2 | CASSDRDVTGELFF       | 9                   | 1         |           |           |           |           |          |
| G        | TRAV1-2    | TRAJ36 | CAVREGTGANNLFF     | 9                    |          |         |                      |                     | 1         |           |           |           |           |          |
| H        |            |        |                    |                      | TRBV5-4  | TRBJ2-2 | CASSDRDVTGELFF       | 9                   | 1         |           |           |           |           |          |
| I        | TRAV29/DV5 | TRAJ53 | CAASGGGSNYKLT      | 8                    | TRBV7-9  | TRBJ1-1 | CASRQEGRPMTAEFF      | 11                  | 1         |           |           |           |           |          |
| J        | TRAV38-1   | TRAJ57 | CAFLDGGGSEKLVF     | 9                    | TRBV7-9  | TRBJ1-1 | CASRQEGRPMTAEFF      | 11                  | 1         |           |           |           |           |          |
| K        | TRAV1-2    | TRAJ24 | CAVRGDSWGLKQF      | 8                    | TRBV7-2  | TRBJ1-1 | CASRENRSNTEAFF       | 10                  | 1         |           |           |           |           |          |
| L        | TRAV41     | TRAJ18 | CAGFDRGSTLGRLYF    | 10                   | TRBV9    | TRBJ2-1 | CASSTPSSYNEQFF       | 9                   | 1         |           |           |           |           |          |
| M        |            |        |                    |                      | TRBV13   | TRBJ2-6 | CASSARSTGGFGANLTF    | 13                  | 1         |           |           |           |           |          |
| N        |            |        |                    |                      | TRBV10-1 | TRBJ2-7 | CASSGRDRDLVEQYF      | 10                  | 1         |           |           |           |           |          |
| O        |            |        |                    |                      | TRBV4-2  | TRBJ2-3 | CASSPRGRGGREDTQYF    | 12                  | 1         |           |           |           |           |          |
| P        |            |        |                    |                      | TRBV12-5 | TRBJ2-7 | CASVQGGSGGRGSYEQYF   | 13                  | 1         |           |           |           |           |          |
| Q        |            |        |                    |                      | TRBV10-2 | TRBJ1-5 | CASSEETGNQPQHF       | 9                   |           | 2         |           |           |           |          |
| R        | TRAV26-1   | TRAJ42 | CIVRLRTNYGGSQGNLIF | 13                   | TRBV5-4  | TRBJ1-3 | CASSFDRGTGNTIYF      | 10                  |           | 2         |           |           |           |          |
| S        |            |        |                    |                      | TRBV5-3  | TRBJ1-3 | CASSFDRGTGNTIYF      | 10                  |           | 2         |           |           |           |          |
| T        |            |        |                    |                      | TRBV5-4  | TRBJ1-3 | CASSFDRGTGNTIYF      | 10                  |           | 2         |           |           |           |          |
| U        | TRAV1-2    | TRAJ9  | CAVRDGGGFKTIF      | 8                    | TRBV10-2 | TRBJ1-5 | CASSEETGNQPQHF       | 9                   |           | 1         |           |           |           |          |
| V        | TRAV1-2    | TRAJ38 | CAVNAGNNRKLW       | 8                    | TRBV13   | TRBJ2-7 | CASSLAGTGGRFSYEQYF   | 13                  |           | 1         |           |           |           |          |
| W        | TRAV1-2    | TRAJ38 | CAVNAGNNRKLW       | 8                    |          |         |                      |                     |           | 1         |           |           |           |          |
| X        | TRAV23/DV6 | TRAJ43 | CAATFLRDMRF        | 6                    | TRBV27   | TRBJ2-2 | CASSYYRLAGELFF       | 9                   |           | 1         |           |           |           |          |
| Y        |            |        |                    |                      | TRBV4-2  | TRBJ2-3 | CASRIWDGGASTDTQYF    | 12                  |           | 1         |           |           |           |          |
| Z        |            |        |                    |                      | TRBV27   | TRBJ1-2 | CASLLWKAGGYTF        | 8                   |           |           |           |           |           |          |
| AA       |            |        |                    |                      | TRBV27   | TRBJ1-3 | CASSPYGGPGNTIYF      | 10                  |           |           |           | 5         |           |          |
| AB       | TRAV1-2    | TRAJ32 | CAVNDGATNKLIF      | 8                    | TRBV2    | TRBJ2-6 | CARAFESGANLTF        | 9                   |           |           |           | 1         |           |          |
| AC       | TRAV1-2    | TRAJ43 | CAVRDGGGRNDRMF     | 8                    | TRBV9    | TRBJ2-7 | CASSVEAGPNEQYF       | 9                   |           |           |           | 1         |           |          |
| AD       |            |        |                    |                      | TRBV9    | TRBJ2-7 | CASSVEAGPNEQYF       | 9                   |           |           |           | 1         |           |          |
| AE       | TRAV8-6    | TRAJ17 | CAVSEISAAGNKLT     | 10                   | TRBV27   | TRBJ1-3 | CASSPYGGPGNTIYF      | 10                  |           |           |           | 1         |           |          |
| AF       | TRAV13-1   | TRAJ45 | CAALEAGGGADGLTF    | 10                   | TRBV9    | TRBJ2-3 | CASSVFGVQRGFGDTQYF   | 14                  |           |           |           | 1         |           |          |
| AG       | TRAV19     | TRAJ53 | CALPDGGSNYKLT      | 9                    | TRBV13   | TRBJ2-7 | CASSRRGSGGASSYEQYF   | 13                  |           |           |           | 1         |           |          |
| AH       | TRAV38-1   | TRAJ56 | CAFMKLWGGANSKLT    | 11                   | TRBV5-4  | TRBJ2-5 | CASSLIGEETQYF        | 8                   |           |           |           | 1         |           |          |
| AI       | TRAV6      | TRAJ9  | CALELLTGNTGGFKTIF  | 12                   | TRBV27   | TRBJ1-5 | CASSLWQGGQPQHF       | 9                   |           |           |           | 1         |           |          |
| AJ       |            |        |                    |                      | TRBV27   | TRBJ2-3 | CASSLPPGGVDTQYF      | 11                  |           |           |           | 1         |           |          |
| AK       |            |        |                    |                      | TRBV4-2  | TRBJ1-1 | CASSQSSGGGRSEAFF     | 11                  |           |           |           |           | 3         |          |
| AL       | TRAV1-2    | TRAJ28 | CAVRDSGAGSYQLTF    | 10                   | TRBV4-2  | TRBJ1-1 | CASSQSSGGGRSEAFF     | 11                  |           |           |           | 2         |           |          |
| AM       |            |        |                    |                      | TRBV4-3  | TRBJ2-3 | CASSQPSQGGRLQYF      | 11                  |           |           |           | 2         |           |          |
| AN       | TRAV14/DV4 | TRAJ24 | CAMREGRTTDSWGKQF   | 12                   | TRBV7-9  | TRBJ2-5 | CASSLGREETQYF        | 8                   |           |           |           | 1         |           |          |
| AO       | TRAV19     | TRAJ44 | CALSEAISTGTASKLTF  | 12                   | TRBV27   | TRBJ2-2 | CASSTWSQNTGELFF      | 10                  |           |           |           | 1         |           |          |
| AP       | TRAV26-1   | TRAJ44 | CIAFYYAALPVRLLF    | 10                   | TRBV27   | TRBJ1-5 | CASSTGGGEGLYSNQPQHF  | 14                  |           |           |           | 1         |           |          |
| AQ       | TRAV14/DV4 | TRAJ44 | CAMREVGGTASKLTF    | 10                   | TRBV7-9  | TRBJ1-6 | CASSIYPGQLYNSPLHF    | 12                  |           |           |           |           | 3         |          |
| AR       | TRAV12-2   | TRAJ45 | CAVSDSGGGADGLTF    | 10                   | TRBV4-1  | TRBJ2-3 | CASSQVAFGDTQYF       | 10                  |           |           |           |           | 1         |          |
| AS       | TRAV14/DV4 | TRAJ52 | CAMREGGGTSYGKLT    | 11                   | TRBV7-2  | TRBJ2-7 | CASSLAGTSGYTYEQYF    | 12                  |           |           |           |           | 1         |          |
| AT       | TRAV14/DV4 | TRAJ17 | CAMSLEGGAGNKLT     | 10                   | TRBV5-4  | TRBJ2-1 | CASSLRQALRNEQFF      | 10                  |           |           |           |           | 1         |          |
| AU       | TRAV17     | TRAJ53 | CATDASKSGGSNYKLT   | 12                   | TRBV18   | TRBJ1-1 | CASSPGEGLVSEAFF      | 11                  |           |           |           |           | 1         |          |
| AV       | TRAV22     | TRAJ28 | CAVDVDSGAGSYQLTF   | 11                   | TRBV14   | TRBJ1-1 | CASSDNRVWTEAFF       | 9                   |           |           |           |           | 1         |          |
| AW       | TRAV36/DV7 | TRAJ37 | CAVSSNTGKLIF       | 8                    | TRBV10-2 | TRBJ2-1 | CASSGVGSGRPNYSYNEQFF | 14                  |           |           |           |           | 1         |          |
| AX       |            |        |                    |                      | TRBV27   | TRBJ1-5 | CASSQWGGQPQHF        | 8                   |           |           |           |           | 1         |          |
| AY       | TRAV14/DV4 | TRAJ18 | CAITIEGSTLGRLYF    | 10                   | TRBV2    | TRBJ1-4 | CAGRGRPNKELFF        | 8                   |           |           |           |           |           | 2        |
| AZ       | TRAV1-2    | TRAJ36 | CAVREGTGANNLFF     | 9                    | TRBV5-3  | TRBJ1-1 | CASSLREMGGKAEAFF     | 11                  |           |           |           |           |           | 1        |
| BA       | TRAV1-2    | TRAJ15 | CAVRDGAGTALIF      | 8                    | TRBV9    | TRBJ2-5 | CASSVEGGGAQETQYF     | 11                  |           |           |           |           |           | 1        |
| BB       | TRAV1-2    | TRAJ38 | CAVNAGNNRKLW       | 8                    | TRBV10-2 | TRBJ2-7 | CASILGTSGREPYEQYF    | 12                  |           |           |           |           |           | 1        |
| BC       |            |        |                    |                      | TRBV10-2 | TRBJ2-7 | CASILGTSGREPYEQYF    | 12                  |           |           |           |           |           | 1        |
| BD       |            |        |                    |                      | TRBV27   | TRBJ1-4 | CASSLYRGIGLFF        | 8                   |           |           |           |           |           | 1        |
|          |            |        |                    |                      |          |         |                      | <b>Grand total</b>  | <b>18</b> | <b>14</b> | <b>14</b> | <b>10</b> | <b>10</b> | <b>7</b> |

Red denotes truncated CDR3 regions.

**Supplementary Table 7. Clonotype counts of B8/NP<sub>30-38</sub>.**

| Clone ID | TRAV         | TRAJ   | CDR3 $\alpha$        | CDR3 $\alpha$ length | TRBV     | TRBJ    | CDR3 $\beta$      | CDR3 $\beta$ length | BP140 | BP147 | BP170 | BP185 | BP191 |
|----------|--------------|--------|----------------------|----------------------|----------|---------|-------------------|---------------------|-------|-------|-------|-------|-------|
| A        |              |        |                      |                      | TRBV19   | TRBJ1-1 | CASSMIPDMNTEAFF   | 10                  | 5     |       | 7     |       |       |
| B        | TRAV38-2/DV8 | TRAJ42 | CAPNYGGSQGNLIF       | 9                    | TRBV19   | TRBJ2-2 | CASGRIAGELFF      | 7                   | 4     |       |       |       |       |
| C        |              |        |                      |                      | TRBV19   | TRBJ1-1 | CASSMVPDMNTEAFF   | 10                  | 3     |       |       |       |       |
| D        |              |        |                      |                      | TRBV19   | TRBJ2-7 | CASSLVGGGEQYF     | 7                   | 2     |       |       |       |       |
| E        | TRAV14/DV4   | TRAJ53 | CAMRGGGSNYKLTFF      | 9                    | TRBV19   | TRBJ1-1 | CASSMIPDMNTEAFF   | 10                  | 1     |       |       |       |       |
| F        |              |        |                      |                      | TRBV19   | TRBJ2-2 | CASGRIAGELFF      | 7                   | 1     |       |       |       |       |
| G        | TRAV14/DV4   | TRAJ28 | CAMREGDTSNSGAGSYQLTF | 15                   | TRBV19   | TRBJ1-1 | CASSMVPDMNTEAFF   | 10                  | 1     |       |       |       |       |
| H        |              |        |                      |                      | TRBV19   | TRBJ1-1 | CASSVIPDMNTEAFF   | 10                  | 1     |       |       |       |       |
| I        | TRAV13-2     | TRAJ13 | CAEISGGYQKVTF        | 8                    | TRBV7-2  | TRBJ1-1 | CASSLVGATAFF      | 7                   | 1     |       |       |       |       |
| J        | TRAV14/DV4   | TRAJ16 | CAMREGGQKLLF         | 7                    | TRBV19   | TRBJ1-6 | CATSTVPDYN SPLHF  | 10                  | 1     |       |       |       |       |
| K        | TRAV38-2/DV8 | TRAJ53 | CAPYSGGSNYKLTFF      | 9                    | TRBV19   | TRBJ2-1 | CASSLIGNEQFF      | 7                   | 1     |       |       |       |       |
| L        |              |        |                      |                      | TRBV29-1 | TRBJ1-2 | CSVVQGAECTF       | 6                   |       | 6     |       |       |       |
| M        | TRAV38-2/DV8 | TRAJ40 | CAPSGTYKYIF          | 6                    | TRBV7-2  | TRBJ2-7 | CASSLVGGGEQYF     | 7                   |       | 6     |       |       |       |
| N        | TRAV14/DV4   | TRAJ12 | CAMSRQGMDSYKLIFF     | 11                   | TRBV29-1 | TRBJ1-2 | CSVVQGAECTF       | 6                   |       | 5     |       |       |       |
| O        | TRAV14/DV4   | TRAJ53 | CAMRGGGSNYKLTFF      | 9                    | TRBV19   | TRBJ1-1 | CASSSIPDFNTEAFF   | 10                  |       | 2     |       |       |       |
| P        | TRAV14/DV4   | TRAJ53 | CAMREDSGGSNYKLTFF    | 11                   | TRBV19   | TRBJ1-1 | CASSMIPDMNTEAFF   | 10                  |       | 1     |       |       |       |
| Q        | TRAV14/DV4   | TRAJ53 | CAMRGGSGGSNYKLTFF    | 11                   | TRBV19   | TRBJ1-1 | CASSIIPDMNTEAFF   | 10                  |       | 1     |       |       |       |
| R        | TRAV14/DV4   | TRAJ6  | CAMRESASGGSYIPTF     | 11                   | TRBV19   | TRBJ1-1 | CASSIIPDMNTEAFF   | 10                  |       | 1     |       |       |       |
| S        |              |        |                      |                      | TRBV19   | TRBJ1-1 | CASSNIPDMNTEAFF   | 10                  |       | 1     |       |       |       |
| T        | TRAV14/DV4   | TRAJ53 | CAMRDSSGSNYKLTFF     | 10                   | TRBV19   | TRBJ1-1 | CASSNVPDMNTEAFF   | 10                  |       | 1     |       |       |       |
| U        | TRAV38-2/DV8 | TRAJ43 | CAYRAPYNNNDMRF       | 9                    | TRBV13   | TRBJ1-2 | CASSQARDRNGVYTF   | 10                  |       | 1     |       |       |       |
| V        | TRAV14/DV4   | TRAJ33 | CAMREGGSNYQLIW       | 9                    | TRBV19   | TRBJ1-1 | CASSMIPDMNTEAFF   | 10                  |       |       |       | 2     |       |
| W        | TRAV14/DV4   | TRAJ53 | CAMREGGGGSNYKLTFF    | 11                   | TRBV19   | TRBJ1-1 | CASSIIPDMNTEAFF   | 10                  |       |       |       | 1     |       |
| X        |              |        |                      |                      | TRBV27   | TRBJ2-1 | CASSPSGTGANEQFF   | 10                  |       |       |       | 1     |       |
| Y        |              |        |                      |                      | TRBV7-9  | TRBJ1-2 | CASSLEGGQHGYTF    | 9                   |       |       |       | 1     |       |
| Z        |              |        |                      |                      | TRBV7-9  | TRBJ2-1 | CASSSSGSSYNEQFF   | 10                  |       |       |       | 1     |       |
| AA       | TRAV1-2      | TRAJ33 | CAVRDDSNYQLIW        | 8                    | TRBV28   | TRBJ1-5 | CASTAQGFNSNPQHF   | 10                  |       |       | 1     |       |       |
| AB       | TRAV14/DV4   | TRAJ5  | CAMSLHDTGRRALTF      | 10                   | TRBV7-2  | TRBJ1-5 | CASSLNFLVGLNQPQHF | 11                  |       |       | 1     |       |       |
| AC       | TRAV19       | TRAJ34 | CALSEAYNTDKLIF       | 9                    | TRBV10-3 | TRBJ1-1 | CAIANRGTEAFF      | 7                   |       |       | 1     |       |       |
| AD       | TRAV19       | TRAJ5  | CALSDPYGGRRALTF      | 10                   | TRBV29-1 | TRBJ2-7 | CSAVGLAGVRSYEQYF  | 11                  |       |       | 1     |       |       |
| AE       | TRAV26-1     | TRAJ48 | CIVRRQSNFGNEKLTFF    | 11                   | TRBV7-9  | TRBJ1-6 | CASSLAREYSPLHF    | 9                   |       |       | 1     |       |       |
| AF       | TRAV26-2     | TRAJ34 | CILRDAYNTDKLIF       | 9                    | TRBV20-1 | TRBJ1-1 | CSARSDRVNTEAFF    | 10                  |       |       | 1     |       |       |
| AG       | TRAV38-2/DV8 | TRAJ12 | CAYRSAPDSSYKLIFF     | 10                   | TRBV2    | TRBJ2-2 | CASRGLSNTGELFF    | 9                   |       |       | 1     |       |       |
| AH       | TRAV38-2/DV8 | TRAJ33 | CAYRSAMDSSNYQLIW     | 10                   | TRBV19   | TRBJ2-2 | CASSTIGPYGELFF    | 9                   |       |       | 1     |       |       |
| AI       | TRAV4        | TRAJ30 | CLLRDDKIIF           | 5                    | TRBV7-9  | TRBJ1-1 | CASSPHQEVTEAFF    | 9                   |       |       | 1     |       |       |
| AJ       | TRAV9-2      | TRAJ43 | CALSEIDMRF           | 5                    | TRBV29-1 | TRBJ1-1 | CSAGTGSANTEAFF    | 9                   |       |       | 1     |       |       |
| AK       |              |        |                      |                      | TRBV19   | TRBJ1-1 | CASSMVPDMNTEAFF   | 10                  |       |       |       | 1     |       |
| AL       |              |        |                      |                      | TRBV19   | TRBJ2-1 | CASNPSAGTLYNEQFF  | 11                  |       |       |       | 1     |       |
| AM       |              |        |                      |                      | TRBV20-1 | TRBJ2-2 | CSARPRRSAGELFF    | 9                   |       |       |       | 1     |       |
| AN       |              |        |                      |                      | TRBV20   | TRBJ2-2 | CSAELLAGKNTGELFF  | 12                  |       |       |       | 1     |       |
| AO       |              |        |                      |                      | TRBV6-2  | TRBJ1-6 | CASSYSKMTAYNSPLHF | 12                  |       |       |       | 1     |       |
| AP       |              |        |                      |                      | TRBV9    | TRBJ1-6 | CASSVGGISPLHF     | 8                   |       |       |       | 1     |       |
| AQ       |              |        |                      |                      | TRBV9    | TRBJ2-7 | CASSPGQGVYEQYF    | 9                   |       |       |       | 1     |       |
| AR       | TRAV13-1     | TRAJ41 | CAASQRMNSSGYALNF     | 10                   | TRBV19   | TRBJ1-5 | CASSLGLTLPQHF     | 8                   |       |       |       | 1     |       |
| AS       | TRAV13-2     | TRAJ26 | CAEKSYGQNFVVF        | 8                    | TRBV2    | TRBJ1-1 | CASSGRTGNTEAFF    | 9                   |       |       |       | 1     |       |
| AT       | TRAV14/DV4   | TRAJ23 | CAMREFYNQGGKLIFF     | 10                   | TRBV19   | TRBJ2-2 | CASSVSRDRNGELFF   | 10                  |       |       |       | 1     |       |
| AU       | TRAV14/DV4   | TRAJ26 | CAMRGGYQGNFVVF       | 8                    |          |         |                   |                     |       |       |       | 1     |       |
| AV       | TRAV19       | TRAJ15 | CALSEATRDQAGTALIF    | 12                   |          |         |                   |                     |       |       |       | 1     |       |
| AW       | TRAV3        | TRAJ31 | CAVRNARLMF           | 5                    | TRBV28   | TRBJ2-3 | CASSQGGGIADTQYF   | 10                  |       |       |       | 1     |       |
| AX       | TRAV38-2/DV8 | TRAJ39 | CAYRSSVYNNAGNMLTF    | 12                   | TRBV4-2  | TRBJ2-1 | CASSQNSVGSYNEQFF  | 11                  |       |       |       | 1     |       |
| AY       | TRAV38-2/DV8 | TRAJ56 | CAYPTGANSKLTFF       | 8                    |          |         |                   |                     |       |       |       | 1     |       |
| AZ       | TRAV8-2      | TRAJ27 | CAVRVNTNAGKSTF       | 9                    | TRBV7-6  | TRBJ2-7 | CASSSSYEQYF       | 6                   |       |       |       | 1     |       |
| BA       | TRAV8-3      | TRAJ29 | CAVAPLNSGNTPLVFF     | 10                   | TRBV28   | TRBJ2-3 | CASSFARTRWEQYF    | 9                   |       |       |       | 1     |       |
| BB       |              |        |                      |                      | TRBV4-3  | TRBJ1-6 | CASSQARDPQGLHFF   | 10                  |       |       |       |       | 1     |
| BC       |              |        |                      |                      | TRBV7-9  | TRBJ2-1 | CASSSAGVEQFF      | 7                   |       |       |       |       | 1     |
| BD       |              |        |                      |                      | TRBV9    | TRBJ1-2 | CASSPGGVYGYTF     | 8                   |       |       |       |       | 1     |
| BE       | TRAV14/DV4   | TRAJ48 | CAIWTFGGEKLTFF       | 8                    | TRBV19   | TRBJ2-3 | CASSRSLTDTQYF     | 8                   |       |       |       |       | 1     |
| BF       | TRAV19       | TRAJ22 | CALTPSSGSARQLTF      | 10                   | TRBV11-2 | TRBJ1-2 | CASSFFGAQQVVDGYTF | 11                  |       |       |       |       | 1     |
| BG       | TRAV20       | TRAJ34 | CAAKGYNTDKLIF        | 8                    | TRBV9    | TRBJ2-2 | CASKRNTGELFF      | 7                   |       |       |       |       | 1     |
| BH       | TRAV26-2     | TRAJ12 | CILRRDRDSSYKLIFF     | 9                    | TRBV20-1 | TRBJ2-5 | CSARDPAPEETQYF    | 9                   |       |       |       |       | 1     |
| BI       | TRAV6        | TRAJ42 | CALENYGGSQGNLIF      | 10                   | TRBV9    | TRBJ2-7 | CASSASAEFFSSYEQYF | 11                  |       |       |       |       | 1     |







**Supplementary Table 10.** TCR sequencing primers

| <b>Primer Name</b> | <b>Sequence</b>        |
|--------------------|------------------------|
| huTRAV1ext         | AACTGCACGTACCAGACATC   |
| huTRAV2ext         | GATGTGCACCAAGACTCC     |
| huTRAV3ext         | AAGATCAGGTCAACGTTGC    |
| huTRAV4ext         | CTCCATGGACTCATATGAAGG  |
| huTRAV5ext         | CTTTTCCTGAGTGTCCGAG    |
| huTRAV6ext         | CACCCTGACCTGCAACTATAC  |
| huTRAV7ext         | GCAAATACAGGGATGGG      |
| huTRAV8-1ext       | CTCACTGGAGTTGGGATG     |
| huTRAV8-3ext       | CACTGTCTCTGAAGGAGCC    |
| huTRAV8-2,4ext     | GCCACCCTGGTTAAAGG      |
| huTRAV8-6ext       | GAGCTGAGGTGCAACTACTC   |
| huTRAV8-7ext       | CTAACAGAGGCCACCCAG     |
| huTRAV9-1_2ext     | TGGTATGTCCAATATCCTGG   |
| huTRAV10ext        | CAAGTGGAGCAGAGTCCTC    |
| huTRAV12-1_3ext    | CARTGTTCCAGAGGGAGC     |
| huTRAV13-1ext      | CATCCTTCAACCCTGAGTG    |
| huTRAV13-2ext      | CAGCGCCTCAGACTACTTC    |
| huTRAV14ext        | AAGATAACTCAAACCCAACCAG |
| huTRAV16ext        | AGTGGAGCTGAAGTGCAAC    |
| huTRAV17ext        | GGAGAAGAGGATCCTCAGG    |
| huTRAV18ext        | TCCAGTATCTAAACAAAGAGCC |
| huTRAV19ext        | AGGTA ACTCAAGCGCAGAC   |
| huTRAV20ext        | CACAGTCAGCGGTTTAAGAG   |
| huTRAV21ext        | TTCTGCAGCTCTGAGTG      |
| huTRAV22ext        | GTCCTCCAGACCTGATTCTC   |
| huTRAV23ext        | TGCTTATGAGA AACTGCG    |
| huTRAV24ext        | CTCAGTCACTGCATGTTTCAG  |
| huTRAV25ext        | GGACTTCACCACGTA CTGC   |
| huTRAV26-1ext      | GCAAACCTGCCTTGTAATC    |
| huTRAV26-2ext      | AGCCAAATTCAATGGAGAG    |
| huTRAV27ext        | TCAGTTTCTAAGCATCCAAGAG |
| huTRAV29ext        | GCAAGTTAAGCAA AATTCACC |
| huTRAV30ext        | CAACAACCAGTGCAGAGTC    |
| huTRAV34ext        | AGA ACTGGAGCAGAGTCCTC  |
| huTRAV35ext        | GGTCAACAGCTGAATCAGAG   |
| huTRAV36ext        | GAAGACAAGGTGGTACAAAGC  |
| huTRAV38ext        | GCACATATGACACCAGTGAG   |
| huTRAV39ext        | CTGTTCTGAGCATGCAG      |
| huTRAV40ext        | GCATCTGTGACTATGAACTGC  |
| huTRAV41ext        | AATGAAGTGGAGCAGAGTCC   |
| huTRACext          | GACCAGCTTGACATCACAG    |
| huTRBV2ext         | TCGATGATCAATTCTCAGTTG  |
| huTRBV3ext         | CAAATACCTGGTCACACAG    |
| huTRBV4ext         | TCGCTTCTCACCTGAATG     |
| huTRBV5-1_4ext     | GATTCTCAGGKCKCCAGTTC   |
| huTRBV5-5_8ext     | GTACCAACAGGYCCTGGGT    |
| huTRBV6-1_3,5_9ext | ACTCAGACCCCAA AATTC    |



|                 |                         |
|-----------------|-------------------------|
| huTRBV6-4ext    | ACTGGCAAAGGAGAAGTCC     |
| huTRBV7-1_3ext  | TRTGATCCAATTTTCAGGTCA   |
| huTRBV7-4_9ext  | CGSWTCTYTG CAGARAGGC    |
| huTRBV9ext      | GATCACAGCAACTGGACAG     |
| huTRBV10-1ext   | CAGAGCCCAAGACACAAG      |
| huTRBV10-2ext   | ACCTTGATGTGTCACCAGAC    |
| huTRBV11ext     | CGATTTTCTGCAGAGACGC     |
| huTRBV12ext     | ARGTGACAGARATGGGACAA    |
| huTRBV13ext     | AGCGATAAAGGAAGCATCC     |
| huTRBV14ext     | CCAACAATCGATTCTTAGCTG   |
| huTRBV15ext     | AGTGACCCTGAGTTGTTCTC    |
| huTRBV16ext     | GTCTTTGATGAAACAGGTATGC  |
| huTRBV17ext     | CAGACCCCCAGACACAAG      |
| huTRBV18ext     | CATAGATGAGTCAGGAATGCC   |
| huTRBV19ext     | AGTTGTGAACAGAATTTGAACC  |
| huTRBV20ext     | AAGTTTCTCATCAACCATGC    |
| huTRBV23ext     | GCGATTCTCATCTCAATGC     |
| huTRBV24ext     | CCTACGGTTGATCTATTACTCC  |
| huTRBV25ext     | ACTACACCTCATCCACTATTCC  |
| huTRBV27,28ext  | TGGTATCGACAAGACCCAG     |
| huTRBV29ext     | TTCTGGTACCGTCAGCAAC     |
| huTRBV30ext     | TCCAGCTGCTCTTCTACTCC    |
| huTRBCext       | TAGAACTGGACTTGACAGCG    |
| huTRAV1int      | GCACCCACATTTCTKTCTTAC   |
| huTRAV2int      | CACTCTGTGTCCAATGCTTAC   |
| huTRAV3int      | ATGCACCTATTCAGTCTCTGG   |
| huTRAV4int      | ATTATATCACGTGGTACCAACAG |
| huTRAV5int      | TACACAGACAGCTCCTCCAC    |
| huTRAV6int      | TGGTACCGACAAGATCCAG     |
| huTRAV7int      | TATGAGAAGCAGAAAGGAAGAC  |
| huTRAV8-1int    | GTCAACACCTTCAGCTTCTC    |
| huTRAV8-3int    | TTTGAGGCTGAATTTAAGAGG   |
| huTRAV8-2,4int  | AGAGTGAAACCTCCTTCCAC    |
| huTRAV8-6int    | AACCAAGGACTCCAGCTTC     |
| huTRAV8-7int    | ATCAGAGGTTTTGAGGCTG     |
| huTRAV9-1_2int  | GAAACCACTTCTTTCCACTTG   |
| huTRAV10int     | GAAAGAACTGCACTCTTCAATG  |
| huTRAV12-1_3int | AAGATGGAAGGTTTACAGCAC   |
| huTRAV13-1int   | TCAGACAGTGCCTCAAACACTAC |
| huTRAV13-2int   | CAGTGAAACATCTCTCTCTGC   |
| huTRAV14int     | AGGCTGTGACTCTGGACTG     |
| huTRAV16int     | GTCCAGTACTCCAGACAACG    |
| huTRAV17int     | CCACCATGAACTGCAGTTAC    |
| huTRAV18int     | TGACAGTTCCTTCCACCTG     |
| huTRAV19int     | TGTGACCTTGGACTGTGTG     |
| huTRAV20int     | TCTGGTATAGGCAAGATCCTG   |
| huTRAV21int     | AAC TTGGTTCTCAACTGCAG   |
| huTRAV22int     | CTGACTCTGTGAACAATTTGC   |

|                    |                       |
|--------------------|-----------------------|
| huTRAV23int        | TGCATTATTGATAGCCATACG |
| huTRAV24int        | TGCCTTACACTGGTACAGATG |
| huTRAV25int        | TATAAGCAAAGGCCTGGTG   |
| huTRAV26-1int      | CGACAGATTCACTCCCAG    |
| huTRAV26-2int      | TTCACTTGCCTTGTAAACCAC |
| huTRAV27int        | CTCACTGTGTACTGCAACTCC |
| huTRAV29int        | CTGCTGAAGGTCCTACATTC  |
| huTRAV30int        | AGAAGCATGGTGAAGCAC    |
| huTRAV34int        | ATCTCACCATAAACTGCACG  |
| huTRAV35int        | ACCTGGCTATGGTACAAGC   |
| huTRAV36int        | ATCTCTGGTTGTCCACGAG   |
| huTRAV38int        | CAGCAGGCAGATGATTCTC   |
| huTRAV39int        | TCAACCACTTCAGACAGACTG |
| huTRAV40int        | GGAGGCGGAAATATTAAGAC  |
| huTRAV41int        | TTGTTTATGCTGAGCTCAGG  |
| huTRACint          | TGTTGCTCTTGAAGTCCATAG |
| huTRBV2int         | TTCACTCTGAAGATCCGGTC  |
| huTRBV3int         | AATCTTCACATCAATTCCCTG |
| huTRBV4int         | CCTGCAGCCAGAAGACTC    |
| huTRBV5-1_4int     | CTTGGAGCTGGRSGACTC    |
| huTRBV5-5_8int     | TCTGAGCTGAATGTGAACG   |
| huTRBV6-1_3,5_9int | GTGTRCCCAGGATATGAACC  |
| huTRBV6-4int       | TGGTTATAGTGTCTCCAGAGC |
| huTRBV7-1_3int     | TCYACTCTGAMGWTCCAGCG  |
| huTRBV7-4_9int     | TGRMGATYCAGCGCACA     |
| huTRBV9int         | GTACCAACAGAGCCTGGAC   |
| huTRBV10-1int      | TGGTATCGACAAGACCTGG   |
| huTRBV10-3int      | GGAACACCAGTGA CTCTGAG |
| huTRBV11int        | GACTCCACTCTCAAGATCCA  |
| huTRBV12int        | CYACTCTGARGATCCAGCC   |
| huTRBV13int        | CATTCTGAACTGAACATGAGC |
| huTRBV14int        | ATTCTACTCTGAAGGTGCAGC |
| huTRBV15int        | ATAACTTCCAATCCAGGAGG  |
| huTRBV16int1       | CTGTAGCCTTGAGATCCAGG  |
| huTRBV17int        | TGTTCACTGGTACCGACAG   |
| huTRBV18int        | CGATTTTCTGCTGAATTTCC  |
| huTRBV19int        | TTCTCTCACTGTGACATCG   |
| huTRBV20int        | ACTCTGACAGTGACCAGTGC  |
| huTRBV23int        | GCAATCCTGTCCTCAGAAC   |
| huTRBV24int        | GATGGATACAGTGTCTCTCGA |
| huTRBV25int        | CAGAGAAGGGAGATCTTTCC  |
| huTRBV27,28int     | TTCYCCCTGATYCTGGAGTC  |
| huTRBV29int        | TCTGACTGTGAGCAACATGAG |
| huTRBV30int        | AGAATCTCTCAGCCTCCAGAC |
| huTRBCint          | TTCTGATGGCTCAAACACAG  |

---
