# Supplementary material for: CD8+ T-cell responses towards conserved influenza B virus epitopes across anatomical sites and age
Source: Springer Nature journal article supplement (doi:10.1038/s41467-024-47576-y), 2024-04-29
Supplement: MOESM3 [file 41467_2024_47576_MOESM3_ESM.pdf]

## Description of Additional Supplementary Files

### **File Name: Supplementary Data 1**

**Description:** Immunopeptidomics peptide identification File contains influenza B virus (IBV) peptides identified through immunopeptidomics and their predicted binding affinities to HLA-B\*07:02, HLA-B\*08:01, HLA-B\*35:01, HLA-B\*35:03 and HLAC\*04:01.

### **File Name: Supplementary Data 2**

**Description:** List of influenza B viruses obtained from NCBI Influenza Virus Resource database accession numbers File contains list of NCBI accession numbers for influenza B (IBV) sequences used to analyse sequence conservation within IBV proteins.

(<https://www.ncbi.nlm.nih.gov/genomes/FLU/Database/nph-select.cgi?go=database>)
